# Supplementary material
Source: publisher figshare collection journal article supplement (https://gsajournals.figshare.com/ndownloader/files/22204404)
Supplement: Supplementary file 1 [file 22204404]

## Sheet: Figure legend
Supplementary Table 4. Genotype calls for 26 KASP markers (open access via CerealsDB website, and further described by Rasheed et al. 2016) genotyped across 349 accessions of the association mapping panel.

## Sheet: Supplementary Table 4
	Rht-B1	Rht-D1	Rht summary	Lr34	Lr34	Fhb1	Fhb1	GluA1	GluA1	Glu summary	Glu-D1	Sr36/Pm6	Sbm1	Gpc-B1	Pinb-D1	Pina-D1	Pin summary	Sus2	Pch1	Ppd-D1a	Ppd-D1	Ppd-D1	Ppd-1 summary	Ppd-A1	Ppd-A1	Ppd-A1	Vrn-A1a	Vrn-A1	Vrn-A1b	Vrn-B1b
	T=dwarf	T=dwarf	Rht summary	T=resistant	C=resistant	G=resistant	G=resistant	G=A*, null, A=1	A=2*,1 , G=null	Glu summary	C=2+12 or others, G=5+10 good quality	T=resistant	T=resistant	T=increased GPC	T=mutant (hard)	G=null (hard)	Pin summary	C=resistant	VPM1=resistant	C(del)=insensitive		C(del)=insensitive	Ppd-1 summary. 1-3=sensitive; 0 = insensitive	C(del)=los of function	G(1027bp del)=insenssiteve GS-100 type deletion (promoter region)	Del(1117bp) = insensitive. GS-105 type deletion (promoter region)	G=spring	C=short vrn	A=spring	C=spring
Name	wMAS000001	wMAS000002	Tall (T)/dwarf (D)	wMAS000003	wMAS000004	wMAS000008	wMAS000009	wMAS000012	wMAS000013	Glu-A1 type	wMAS000014	wMAS000015	wMAS000016	wMAS000017	wMAS000018	wMAS000019	Hard (H)/soft (S)	wMAS000021	wMAS000023	wMAS000024	wMAS000025	wMAS000026	Ppd-D1 haplotype	wMAS000029	wMAS000030	wMAS000031	wMAS000033	wMAS000034	wMAS000035	wMAS000037
1855_83	T:T	G:G	D	T:T	C:C	C:C	A:A	G:G	A:A	2*	G:G	G:G	C:C	A:A	T:T	A:A	H	T:T	Hobbit Sib:Hobbit Sib	T:T	C:C	G:G	1	A:A	C:C	wildtype:wildtype	A:A	C:C	C:C	C:C
93_ANAHUAC 75_brown	T:T	G:G	D	A:A	T:T	NA	A:A	A:A	A:A	1	G:G	G:G	C:C	A:A	C:C	G:G	H	T:T	NA	T:T	C:C	G:G	1	A:A	C:C	wildtype:wildtype	A:A	C:C	C:C	G:G
ABURA_KOMUGHI	C:C	G:G	T	A:A	T:T	C:C	A:A	G:G	A:A	2*	C:C	G:G	T:T	A:A	C:C	A:A	S	T:T	Hobbit Sib:Hobbit Sib	C:C	C:C	C:C	3	A:A	NA	NA	A:A	C:C	A:A	G:G
AC_VISTA	C:C	T:T	D	A:A	T:T	NA	A:A	A:A	A:A	1	C:C	G:G	C:C	A:A	C:C	G:G	H	T:T	Hobbit Sib:Hobbit Sib	T:T	C:C	G:G	1	A:A	C:C	wildtype:wildtype	G:G	C:C	C:C	G:G
AFRICA_43	C:C	G:G	T	A:A	T:T	C:C	A:A	G:G	G:G	null	G:G	G:G	C:C	A:A	C:C	A:A	S	T:T	Hobbit Sib:Hobbit Sib	C:C	G:G	G:G	2	A:A	C:C	wildtype:wildtype	G:G	C:C	C:C	G:G
Agatha	C:C	T:T	D	T:T	C:C	NA	A:A	G:G	A:A	2*	C:C	G:G	C:C	A:A	C:C	G:G	H	T:T	Hobbit Sib:Hobbit Sib	C:C	C:C	G:G	0	A:A	C:C	wildtype:wildtype	G:G	C:C	C:C	G:G
Altar_SIB	C:C	T:T	D	T:T	C:C	NA	A:A	G:G	A:A	2*	G:G	G:G	C:C	A:A	C:C	A:A	S	T:T	Hobbit Sib:Hobbit Sib	T:T	C:C	G:G	1	A:A	C:C	wildtype:wildtype	A:A	C:C	C:C	G:G
AMETISTA	T:T	G:G	D	A:A	T:T	NA	A:A	G:G	A:A	2*	G:G	G:G	C:C	A:A	C:C	G:G	H	T:T	Hobbit Sib:Hobbit Sib	C:C	C:C	C:C	2	A:A	C:C	wildtype:wildtype	A:A	T:T	C:C	G:G
ANAHUAC_75	T:T	G:G	D	A:A	T:T	NA	A:A	A:A	A:A	1	G:G	G:G	C:C	A:A	C:C	G:G	H	T:T	Hobbit Sib:Hobbit Sib	T:T	C:C	G:G	1	A:A	C:C	wildtype:wildtype	A:A	C:C	C:C	G:G
ANAHUAC_75_GISELE	T:T	G:G	D	A:A	T:T	NA	A:A	A:A	A:A	1	G:G	G:G	C:C	A:A	C:C	G:G	H	T:T	Hobbit Sib:Hobbit Sib	T:T	C:C	G:G	1	A:A	C:C	wildtype:wildtype	A:A	C:C	C:C	G:G
ANGAS	T:T	G:G	D	A:A	T:T	NA	A:A	G:G	A:A	2*	C:C	G:G	C:C	A:A	T:T	A:A	H	C:C	Hobbit Sib:Hobbit Sib	T:T	C:C	G:G	1	A:A	C:C	wildtype:wildtype	G:G	C:C	C:C	G:G
Baviacora	T:T	G:G	D	A:A	T:T	C:C	A:A	G:G	A:A	2*	G:G	G:G	C:C	A:A	C:C	G:G	H	T:T	Hobbit Sib:Hobbit Sib	T:T	C:C	G:G	1	A:A	C:C	wildtype:wildtype	A:A	T:T	C:C	G:G
BET_DAGAN_131	C:C	G:G	T	A:A	T:T	NA	A:A	G:G	A:A	2*	C:C	G:G	T:T	A:A	C:C	A:A	S	T:T	Hobbit Sib:Hobbit Sib	C:C	C:C	C:C	3	A:A	C:C	NA	A:A	T:T	C:C	G:G
BIOINTA_1001	T:T	G:G	D	A:A	T:T	NA	A:A	A:A	A:A	1	G:G	G:G	C:C	A:A	T:T	A:A	H	T:T	Hobbit Sib:Hobbit Sib	T:T	C:C	G:G	1	A:A	C:C	wildtype:wildtype	A:A	T:T	C:C	G:G
BR_18_TERENA	C:C	T:T	D	A:A	T:T	NA	A:A	A:A	A:A	1	G:G	G:G	C:C	A:A	C:C	G:G	H	T:T	Hobbit Sib:Hobbit Sib	T:T	C:C	G:G	1	A:A	C:C	wildtype:wildtype	A:A	C:C	C:C	G:G
BRILHANTE	C:C	G:G	T	A:A	T:T	NA	A:A	G:G	A:A	2*	G:G	G:G	C:C	A:A	C:C	A:A	S	T:T	Hobbit Sib:Hobbit Sib	T:T	C:C	G:G	1	A:A	C:C	wildtype:wildtype	A:A	C:C	A:A	G:G
BRS_119	T:T	G:G	D	A:A	T:T	C:C	A:A	G:G	A:A	2*	G:G	G:G	C:C	A:A	C:C	A:A	S	T:T	Hobbit Sib:Hobbit Sib	T:T	C:C	G:G	1	C:C	C:C	wildtype:wildtype	A:A	C:C	C:C	G:G
BRS_120	T:T	G:G	D	A:A	T:T	NA	A:A	G:G	A:A	2*	G:G	G:G	C:C	A:A	C:C	A:A	S	T:T	Hobbit Sib:Hobbit Sib	C:C	C:C	C:C	3	A:A	C:C	wildtype:wildtype	A:A	C:C	A:A	G:G
BRS_179	C:C	G:G	T	A:A	T:T	NA	A:A	G:G	A:A	2*	G:G	G:G	C:C	A:A	C:C	A:A	S	T:T	Hobbit Sib:Hobbit Sib	C:C	C:C	C:C	3	A:A	C:C	wildtype:wildtype	A:A	C:C	C:C	G:G
BRS_192	T:T	G:G	D	A:A	T:T	NA	A:A	G:G	A:A	2*	C:C	G:G	C:C	A:A	C:C	A:A	S	T:T	Hobbit Sib:Hobbit Sib	C:C	C:C	C:C	3	A:A	C:C	wildtype:wildtype	A:A	C:C	A:A	G:G
BRS_193	T:T	G:G	D	A:A	T:T	NA	A:A	G:G	A:A	2*	G:G	T:T	C:C	A:A	C:C	G:G	H	C:C	Hobbit Sib:Hobbit Sib	C:C	C:C	C:C	3	A:A	C:C	wildtype:wildtype	A:A	C:C	C:C	G:G
BRS_194	C:C	G:G	T	A:A	T:T	NA	A:A	G:G	A:A	2*	G:G	NA	C:C	A:A	C:C	A:A	S	C:C	Hobbit Sib:Hobbit Sib	C:C	C:C	C:C	3	A:A	C:C	wildtype:wildtype	A:A	T:T	C:C	G:G
BRS_207	T:T	G:G	D	A:A	T:T	NA	A:A	A:A	A:A	1	G:G	G:G	C:C	A:A	C:C	G:G	H	T:T	Hobbit Sib:Hobbit Sib	T:T	C:C	G:G	1	C:C	C:C	wildtype:wildtype	A:A	T:T	C:C	G:G
BRS_208	C:C	G:G	T	T:T	C:C	C:C	A:A	A:A	A:A	1	C:C	NA	C:C	A:A	C:C	G:G	H	NA	Hobbit Sib:Hobbit Sib	C:C	C:C	C:C	3	NA	C:C	wildtype:wildtype	A:A	T:T	C:C	G:G
BRS_209_GISELE	T:T	G:G	D	A:A	T:T	NA	A:A	A:A	A:A	1	G:G	G:G	C:C	A:A	C:C	G:G	H	T:T	Hobbit Sib:Hobbit Sib	C:C	C:C	C:C	3	A:A	C:C	wildtype:wildtype	A:A	C:C	C:C	G:G
BRS_210	C:C	T:T	D	A:A	T:T	NA	A:A	A:A	A:A	1	C:C	G:G	C:C	A:A	C:C	G:G	H	T:T	Hobbit Sib:Hobbit Sib	C:C	C:C	C:C	3	A:A	C:C	wildtype:wildtype	A:A	C:C	C:C	G:G
BRS_234	T:T	G:G	D	A:A	T:T	C:C	A:A	G:G	A:A	2*	C:C	G:G	C:C	A:A	C:C	G:G	H	T:T	Hobbit Sib:Hobbit Sib	C:C	C:C	C:C	3	A:A	C:C	wildtype:wildtype	A:A	C:C	A:A	G:G
BRS_249	T:T	G:G	D	A:A	T:T	C:C	A:A	G:G	A:A	2*	G:G	G:G	C:C	A:A	T:T	A:A	H	T:T	Hobbit Sib:Hobbit Sib	C:C	C:C	C:C	3	C:C	C:C	wildtype:wildtype	A:A	C:C	C:C	G:G
BRS_254	T:T	G:G	D	T:T	C:C	C:C	A:A	A:A	A:A	1	G:G	G:G	C:C	A:A	C:C	G:G	H	T:T	Hobbit Sib:Hobbit Sib	T:T	C:C	G:G	1	C:C	C:C	wildtype:wildtype	G:G	C:C	C:C	G:G
BRS_264	T:T	G:G	D	A:A	T:T	NA	A:A	A:A	A:A	1	G:G	G:G	C:C	A:A	C:C	G:G	H	T:T	Hobbit Sib:Hobbit Sib	T:T	C:C	G:G	1	A:A	C:C	wildtype:wildtype	G:G	C:C	C:C	G:G
BRS_277	T:T	G:G	D	A:A	T:T	C:C	A:A	G:G	A:A	2*	C:C	G:G	T:T	A:A	C:C	G:G	H	T:T	Hobbit Sib:Hobbit Sib	T:T	C:C	G:G	1	A:A	C:C	wildtype:wildtype	A:A	T:T	C:C	G:G
BRS_296	T:T	G:G	D	T:T	C:C	C:C	A:A	G:G	G:G	null	C:C	G:G	C:C	A:A	T:T	A:A	H	T:T	Hobbit Sib:Hobbit Sib	C:C	C:C	C:C	3	C:C	C:C	wildtype:wildtype	A:A	C:C	A:A	G:G
BRS_327	C:C	G:G	T	A:A	T:T	C:C	A:A	G:G	A:A	2*	G:G	T:T	C:C	A:A	C:C	A:A	S	C:C	Hobbit Sib:Hobbit Sib	C:C	C:C	C:C	3	A:A	C:C	wildtype:wildtype	A:A	C:C	C:C	G:G
BRS_329	C:C	T:T	D	A:A	T:T	C:C	A:A	G:G	A:A	2*	C:C	G:G	C:C	A:A	C:C	A:A	S	T:T	Hobbit Sib:Hobbit Sib	T:T	C:C	G:G	1	A:A	G:G	NA	A:A	T:T	C:C	G:G
BRS_331	C:C	T:T	D	A:A	T:T	NA	A:A	G:G	A:A	2*	G:G	G:G	C:C	A:A	C:C	G:G	H	T:T	Hobbit Sib:Hobbit Sib	C:C	C:C	C:C	3	A:A	G:G	NA	A:A	T:T	C:C	G:G
BRS_Angico	T:T	G:G	D	A:A	T:T	NA	A:A	G:G	A:A	2*	C:C	G:G	C:C	A:A	C:C	A:A	S	T:T	Hobbit Sib:Hobbit Sib	C:C	C:C	C:C	3	A:A	C:C	wildtype:wildtype	A:A	T:T	C:C	G:G
BRS_Camboata	T:T	G:G	D	T:T	C:C	NA	A:A	G:G	G:G	null	C:C	G:G	C:C	A:A	C:C	A:A	S	T:T	Hobbit Sib:Hobbit Sib	C:C	C:C	C:C	3	A:A	C:C	wildtype:wildtype	A:A	C:C	C:C	G:G
BRS_Camboim	T:T	G:G	D	A:A	T:T	NA	A:A	G:G	A:A	2*	C:C	G:G	C:C	A:A	C:C	G:G	H	T:T	Hobbit Sib:Hobbit Sib	C:C	C:C	C:C	3	A:A	C:C	wildtype:wildtype	A:A	C:C	A:A	G:G
BRS_Gaivota	T:T	G:G	D	A:A	T:T	NA	A:A	G:G	A:A	2*	C:C	G:G	C:C	A:A	C:C	G:G	H	T:T	Hobbit Sib:Hobbit Sib	C:C	C:C	C:C	3	A:A	C:C	wildtype:wildtype	A:A	T:T	C:C	G:G
BRS_Gralha_Azul	T:T	G:G	D	A:A	T:T	C:C	A:A	A:A	A:A	1	G:G	G:G	C:C	A:A	C:C	G:G	H	T:T	Hobbit Sib:Hobbit Sib	C:C	C:C	C:C	3	C:C	C:C	wildtype:wildtype	A:A	C:C	C:C	G:G
BRS_Guabiju	C:C	G:G	T	A:A	T:T	NA	A:A	A:A	A:A	1	C:C	G:G	T:T	A:A	C:C	G:G	H	T:T	Hobbit Sib:Hobbit Sib	T:T	C:C	G:G	1	C:C	C:C	wildtype:wildtype	A:A	C:C	C:C	G:G
BRS_Guamirim	C:C	T:T	D	T:T	C:C	C:C	A:A	G:G	A:A	2*	C:C	G:G	C:C	A:A	C:C	G:G	H	T:T	Hobbit Sib:Hobbit Sib	C:C	C:C	C:C	3	A:A	C:C	wildtype:wildtype	A:A	C:C	C:C	G:G
BRS_Louro	T:T	G:G	D	A:A	T:T	NA	A:A	G:G	G:G	null	C:C	G:G	C:C	A:A	C:C	A:A	S	T:T	Hobbit Sib:Hobbit Sib	C:C	C:C	C:C	3	A:A	C:C	wildtype:wildtype	A:A	C:C	A:A	G:G
BRS_Marcante	C:C	T:T	D	T:T	C:C	C:C	A:A	G:G	A:A	2*	G:G	G:G	C:C	A:A	C:C	G:G	H	T:T	Hobbit Sib:Hobbit Sib	C:C	C:C	C:C	3	A:A	NA	NA	A:A	C:C	C:C	G:G
BRS_Pardela	C:C	T:T	D	A:A	T:T	C:C	A:A	G:G	A:A	2*	G:G	G:G	C:C	A:A	C:C	G:G	H	T:T	Hobbit Sib:Hobbit Sib	T:T	C:C	G:G	1	C:C	C:C	wildtype:wildtype	A:A	C:C	C:C	G:G
BRS_Parrudo	C:C	T:T	D	A:A	T:T	NA	A:A	G:G	A:A	2*	G:G	G:G	C:C	A:A	C:C	G:G	H	T:T	Hobbit Sib:Hobbit Sib	C:C	C:C	C:C	3	A:A	NA	NA	A:A	T:T	C:C	G:G
BRS_Sabia	T:T	G:G	D	T:T	C:C	C:C	A:A	G:G	A:A	2*	C:C	G:G	C:C	A:A	T:T	A:A	H	T:T	Hobbit Sib:Hobbit Sib	C:C	C:C	C:C	3	A:A	C:C	wildtype:wildtype	A:A	C:C	C:C	C:C
BRS_Taruma	T:T	G:G	D	A:A	T:T	C:C	NA	G:G	A:A	2*	G:G	T:T	C:C	A:A	C:C	A:A	S	C:C	Hobbit Sib:Hobbit Sib	C:C	C:C	C:C	3	A:A	G:G	NA	A:A	C:C	C:C	G:G
BRS_Umbu	T:T	G:G	D	A:A	T:T	C:C	NA	G:G	A:A	2*	C:C	G:G	C:C	A:A	C:C	A:A	S	T:T	Hobbit Sib:Hobbit Sib	C:C	C:C	C:C	3	A:A	C:C	wildtype:wildtype	A:A	C:C	NA	G:G
BUCK_Brasil	T:T	G:G	D	A:A	T:T	NA	A:A	G:G	A:A	2*	C:C	G:G	C:C	A:A	C:C	A:A	S	T:T	Hobbit Sib:Hobbit Sib	T:T	C:C	G:G	1	A:A	C:C	wildtype:wildtype	A:A	C:C	C:C	G:G
BUCK_Poncho	C:C	T:T	D	A:A	T:T	C:C	A:A	G:G	A:A	2*	G:G	G:G	T:T	A:A	T:T	A:A	H	T:T	Hobbit Sib:Hobbit Sib	C:C	C:C	C:C	3	A:A	C:C	wildtype:wildtype	A:A	T:T	C:C	G:G
BUL_BUL	T:T	G:G	D	A:A	T:T	C:C	A:A	G:G	A:A	2*	C:C	G:G	C:C	A:A	C:C	G:G	H	T:T	Hobbit Sib:Hobbit Sib	T:T	C:C	G:G	1	A:A	C:C	wildtype:wildtype	G:G	C:C	C:C	G:G
CAILLOUX	C:C	G:G	T	A:A	T:T	NA	A:A	G:G	A:A	2*	C:C	G:G	T:T	A:A	C:C	A:A	S	T:T	Hobbit Sib:Hobbit Sib	C:C	G:G	G:G	2	A:A	C:C	wildtype:wildtype	G:G	C:C	C:C	G:G
Campeiro	T:T	G:G	D	A:A	T:T	NA	A:A	A:A	A:A	1	G:G	G:G	C:C	A:A	C:C	A:A	S	T:T	Hobbit Sib:Hobbit Sib	T:T	C:C	G:G	1	A:A	NA	NA	A:A	T:T	C:C	G:G
Carazinho	C:C	G:G	T	T:T	C:C	C:C	A:A	G:G	G:G	null	C:C	G:G	C:C	A:A	C:C	A:A	S	T:T	Hobbit Sib:Hobbit Sib	T:T	C:C	G:G	1	A:A	C:C	wildtype:wildtype	A:A	C:C	C:C	G:G
CASS036H00064S	C:C	G:G	T	A:A	T:T	C:C	A:A	G:G	G:G	null	C:C	G:G	T:T	A:A	C:C	A:A	S	T:T	NA	C:C	C:C	G:G	0	A:A	C:C	deletion:deletion	A:A	C:C	C:C	G:G
CASW95Y00134S	T:T	G:G	D	A:A	T:T	C:C	A:A	G:G	G:G	null	C:C	G:G	T:T	A:A	NA	A:A	NA	T:T	VPM1:VPM1	C:C	C:C	G:G	0	A:A	C:C	deletion:deletion	A:A	C:C	C:C	G:G
CASW95Y00135S	C:C	G:G	T	A:A	T:T	C:C	A:A	G:G	G:G	null	C:C	G:G	T:T	A:A	NA	A:A	NA	T:T	Hobbit Sib:Hobbit Sib	C:C	C:C	G:G	0	A:A	C:C	deletion:deletion	A:A	C:C	C:C	G:G
CASW96Y00526S	C:C	G:G	T	A:A	T:T	C:C	A:A	G:G	A:A	2*	C:C	G:G	T:T	A:A	NA	A:A	NA	T:T	VPM1:VPM1	C:C	C:C	G:G	0	A:A	C:C	wildtype:wildtype	A:A	C:C	C:C	G:G
CBF_ENT_014SEL	T:T	G:G	D	A:A	T:T	NA	A:A	G:G	A:A	2*	G:G	G:G	C:C	A:A	C:C	G:G	H	T:T	Hobbit Sib:Hobbit Sib	T:T	C:C	G:G	1	A:A	C:C	wildtype:wildtype	A:A	C:C	C:C	C:C
CBF_ENT_14	T:T	G:G	D	A:A	T:T	NA	A:A	G:G	A:A	2*	G:G	G:G	C:C	A:A	C:C	G:G	H	T:T	Hobbit Sib:Hobbit Sib	T:T	C:C	G:G	1	A:A	C:C	wildtype:wildtype	A:A	C:C	C:C	C:C
CBF_ENT_16	C:C	G:G	T	A:A	T:T	NA	A:A	G:G	G:G	null	G:G	G:G	C:C	A:A	T:T	A:A	H	T:T	Hobbit Sib:Hobbit Sib	T:T	C:C	G:G	1	A:A	C:C	wildtype:wildtype	A:A	T:T	C:C	G:G
CBF_ENT_25	C:C	G:G	T	A:A	T:T	C:C	NA	A:A	A:A	1	C:C	G:G	C:C	A:A	T:T	A:A	H	T:T	Hobbit Sib:Hobbit Sib	C:C	C:C	C:C	3	A:A	C:C	wildtype:wildtype	A:A	C:C	C:C	G:G
CBF_ENT_6	T:T	G:G	D	T:T	C:C	NA	A:A	G:G	A:A	2*	G:G	G:G	C:C	A:A	NA	NA	NA	T:T	Hobbit Sib:Hobbit Sib	T:T	C:C	G:G	1	C:C	C:C	wildtype:wildtype	A:A	T:T	C:C	G:G
CBF_ENT_7	C:C	G:G	T	T:T	C:C	NA	A:A	G:G	G:G	null	C:C	G:G	C:C	A:A	C:C	G:G	H	T:T	Hobbit Sib:Hobbit Sib	T:T	C:C	G:G	1	A:A	C:C	wildtype:wildtype	A:A	T:T	C:C	G:G
CD_101	C:C	T:T	D	A:A	T:T	NA	A:A	G:G	A:A	2*	G:G	G:G	C:C	A:A	C:C	A:A	S	T:T	Hobbit Sib:Hobbit Sib	T:T	C:C	G:G	1	A:A	C:C	wildtype:wildtype	A:A	C:C	C:C	C:C
CD_102	T:T	G:G	D	A:A	T:T	C:C	NA	G:G	A:A	2*	G:G	G:G	C:C	A:A	C:C	A:A	S	T:T	Hobbit Sib:Hobbit Sib	C:C	C:C	C:C	3	A:A	G:G	NA	A:A	C:C	A:A	G:G
CD_103	T:T	G:G	D	T:T	C:C	NA	A:A	A:A	A:A	1	C:C	G:G	C:C	A:A	T:T	A:A	H	T:T	Hobbit Sib:Hobbit Sib	T:T	C:C	G:G	1	A:A	C:C	wildtype:wildtype	A:A	C:C	C:C	G:G
CD_104	T:T	G:G	D	A:A	T:T	C:C	A:A	G:G	A:A	2*	G:G	G:G	C:C	A:A	C:C	G:G	H	T:T	Hobbit Sib:Hobbit Sib	T:T	C:C	G:G	1	A:A	C:C	wildtype:wildtype	A:A	C:C	C:C	G:G
CD_105	T:T	G:G	D	A:A	T:T	NA	A:A	A:A	A:A	1	G:G	G:G	C:C	A:A	T:T	A:A	H	T:T	Hobbit Sib:Hobbit Sib	T:T	C:C	G:G	1	A:A	C:C	wildtype:wildtype	A:A	C:C	C:C	G:G
CD_106	T:T	G:G	D	T:T	C:C	C:C	A:A	A:A	A:A	1	G:G	G:G	C:C	A:A	C:C	G:G	H	T:T	Hobbit Sib:Hobbit Sib	T:T	C:C	G:G	1	A:A	C:C	wildtype:wildtype	A:A	C:C	C:C	G:G
CD_107	T:T	G:G	D	T:T	C:C	NA	A:A	A:A	A:A	1	C:C	G:G	C:C	A:A	T:T	A:A	H	T:T	Hobbit Sib:Hobbit Sib	T:T	C:C	G:G	1	A:A	C:C	wildtype:wildtype	A:A	C:C	C:C	G:G
CD_108	T:T	G:G	D	A:A	T:T	NA	A:A	G:G	A:A	2*	G:G	G:G	C:C	A:A	C:C	G:G	H	T:T	Hobbit Sib:Hobbit Sib	T:T	C:C	G:G	1	A:A	C:C	wildtype:wildtype	G:G	C:C	C:C	G:G
CD_109	C:C	G:G	T	A:A	T:T	NA	A:A	G:G	G:G	null	G:G	G:G	C:C	A:A	C:C	A:A	S	T:T	Hobbit Sib:Hobbit Sib	C:C	C:C	C:C	3	C:C	C:C	wildtype:wildtype	A:A	C:C	A:A	G:G
CD_110	T:T	G:G	D	A:A	T:T	NA	A:A	A:A	A:A	1	C:C	G:G	C:C	A:A	C:C	G:G	H	T:T	Hobbit Sib:Hobbit Sib	C:C	C:C	C:C	3	A:A	C:C	wildtype:wildtype	A:A	C:C	C:C	G:G
CD_111	T:T	G:G	D	A:A	T:T	NA	A:A	A:A	A:A	1	NA	G:G	C:C	A:A	C:C	G:G	H	T:T	Hobbit Sib:Hobbit Sib	C:C	C:C	C:C	3	A:A	C:C	wildtype:wildtype	A:A	C:C	C:C	G:G
CD_112	C:C	T:T	D	A:A	T:T	NA	A:A	G:G	A:A	2*	G:G	G:G	C:C	A:A	C:C	G:G	H	T:T	Hobbit Sib:Hobbit Sib	T:T	C:C	G:G	1	A:A	C:C	wildtype:wildtype	A:A	C:C	C:C	G:G
CD_113	T:T	G:G	D	A:A	T:T	NA	A:A	G:G	A:A	2*	G:G	G:G	C:C	A:A	C:C	G:G	H	T:T	Hobbit Sib:Hobbit Sib	T:T	C:C	G:G	1	C:C	C:C	wildtype:wildtype	A:A	C:C	C:C	G:G
CD_114	C:C	T:T	D	A:A	T:T	NA	A:A	A:A	A:A	1	G:G	G:G	C:C	A:A	C:C	G:G	H	T:T	Hobbit Sib:Hobbit Sib	T:T	C:C	G:G	1	A:A	C:C	wildtype:wildtype	A:A	C:C	C:C	C:C
CD_115	T:T	G:G	D	A:A	T:T	C:C	A:A	G:G	A:A	2*	G:G	G:G	C:C	A:A	C:C	A:A	S	T:T	Hobbit Sib:Hobbit Sib	C:C	C:C	C:C	3	A:A	C:C	wildtype:wildtype	A:A	C:C	C:C	G:G
CD_116	T:T	G:G	D	A:A	T:T	C:C	A:A	G:G	A:A	2*	G:G	G:G	T:T	A:A	C:C	G:G	H	T:T	Hobbit Sib:Hobbit Sib	T:T	C:C	G:G	1	A:A	C:C	wildtype:wildtype	A:A	C:C	C:C	G:G
CD_117	T:T	G:G	D	A:A	T:T	C:C	NA	G:G	A:A	2*	G:G	G:G	C:C	A:A	C:C	G:G	H	T:T	Hobbit Sib:Hobbit Sib	C:C	C:C	C:C	3	A:A	C:C	wildtype:wildtype	A:A	C:C	C:C	G:G
CD_119	T:T	G:G	D	A:A	T:T	NA	A:A	G:G	A:A	2*	G:G	G:G	C:C	A:A	C:C	A:A	S	T:T	Hobbit Sib:Hobbit Sib	C:C	C:C	C:C	3	A:A	C:C	wildtype:wildtype	A:A	C:C	A:A	G:G
CD_120	T:T	G:G	D	A:A	T:T	NA	A:A	G:G	A:A	2*	G:G	G:G	C:C	A:A	C:C	A:A	S	T:T	Hobbit Sib:Hobbit Sib	C:C	C:C	C:C	3	A:A	C:C	wildtype:wildtype	A:A	C:C	C:C	G:G
CD_121	T:T	G:G	D	A:A	T:T	C:C	A:A	G:G	G:G	null	G:G	G:G	C:C	A:A	C:C	A:A	S	T:T	Hobbit Sib:Hobbit Sib	T:T	C:C	G:G	1	A:A	C:C	wildtype:wildtype	A:A	C:C	C:C	G:G
CD_122	C:C	T:T	D	A:A	T:T	C:C	A:A	A:A	A:A	1	G:G	G:G	C:C	A:A	C:C	G:G	H	T:T	Hobbit Sib:Hobbit Sib	T:T	C:C	G:G	1	C:C	C:C	wildtype:wildtype	A:A	C:C	C:C	G:G
CD_123	T:T	G:G	D	A:A	T:T	NA	A:A	G:G	A:A	2*	G:G	G:G	C:C	A:A	C:C	A:A	S	T:T	Hobbit Sib:Hobbit Sib	T:T	C:C	G:G	1	NA	C:C	wildtype:wildtype	G:G	C:C	C:C	G:G
CD_124	T:T	G:G	D	A:A	T:T	NA	A:A	G:G	A:A	2*	G:G	G:G	C:C	A:A	C:C	G:G	H	T:T	Hobbit Sib:Hobbit Sib	T:T	C:C	G:G	1	A:A	C:C	wildtype:wildtype	A:A	T:T	C:C	G:G
CD_1252	T:T	G:G	D	A:A	T:T	C:C	A:A	A:A	A:A	1	G:G	G:G	C:C	A:A	C:C	G:G	H	T:T	Hobbit Sib:Hobbit Sib	T:T	C:C	G:G	1	A:A	C:C	wildtype:wildtype	A:A	C:C	C:C	G:G
CD_150	T:T	G:G	D	A:A	T:T	C:C	A:A	G:G	A:A	2*	G:G	G:G	C:C	A:A	C:C	G:G	H	T:T	Hobbit Sib:Hobbit Sib	T:T	C:C	G:G	1	A:A	C:C	wildtype:wildtype	G:G	C:C	C:C	G:G
CD_151	T:T	G:G	D	A:A	T:T	C:C	A:A	G:G	A:A	2*	G:G	G:G	C:C	A:A	C:C	G:G	H	T:T	Hobbit Sib:Hobbit Sib	T:T	C:C	G:G	1	A:A	C:C	wildtype:wildtype	A:A	C:C	C:C	G:G
CD_154	T:T	G:G	D	A:A	T:T	C:C	A:A	G:G	A:A	2*	G:G	G:G	C:C	A:A	C:C	G:G	H	T:T	Hobbit Sib:Hobbit Sib	T:T	C:C	G:G	1	A:A	C:C	wildtype:wildtype	A:A	C:C	C:C	G:G
CD_1550	T:T	G:G	D	A:A	T:T	NA	A:A	G:G	A:A	2*	G:G	G:G	C:C	A:A	C:C	G:G	H	T:T	Hobbit Sib:Hobbit Sib	C:C	C:C	C:C	3	A:A	C:C	wildtype:wildtype	A:A	T:T	C:C	G:G
CEP_11	C:C	G:G	T	A:A	T:T	NA	A:A	G:G	A:A	2*	C:C	G:G	C:C	A:A	C:C	A:A	S	T:T	Hobbit Sib:Hobbit Sib	C:C	C:C	C:C	3	A:A	NA	NA	A:A	C:C	A:A	G:G
CEP_14_Tapes	C:C	G:G	T	T:T	C:C	C:C	A:A	A:A	A:A	1	C:C	T:T	C:C	A:A	C:C	A:A	S	C:C	Hobbit Sib:Hobbit Sib	C:C	C:C	C:C	3	A:A	C:C	wildtype:wildtype	A:A	C:C	A:A	G:G
CEP_21_Campos	C:C	G:G	T	A:A	T:T	NA	A:A	A:A	A:A	1	C:C	T:T	T:T	A:A	T:T	A:A	H	C:C	Hobbit Sib:Hobbit Sib	C:C	C:C	C:C	3	C:C	C:C	wildtype:wildtype	A:A	C:C	C:C	G:G
CEP_24_Industrial_825601	C:C	G:G	T	A:A	T:T	NA	A:A	G:G	A:A	2*	G:G	G:G	C:C	A:A	C:C	A:A	S	T:T	Hobbit Sib:Hobbit Sib	C:C	C:C	C:C	3	A:A	C:C	wildtype:wildtype	A:A	C:C	A:A	G:G
CEP_24_Industrial_825602	C:C	G:G	T	T:T	C:C	C:C	A:A	G:G	A:A	2*	G:G	G:G	C:C	A:A	C:C	A:A	S	T:T	Hobbit Sib:Hobbit Sib	C:C	C:C	C:C	3	A:A	C:C	wildtype:wildtype	A:A	C:C	C:C	G:G
CEP_27_Missoes	C:C	G:G	T	A:A	T:T	C:C	A:A	G:G	A:A	2*	G:G	T:T	C:C	A:A	C:C	A:A	S	C:C	Hobbit Sib:Hobbit Sib	C:C	C:C	C:C	3	C:C	C:C	wildtype:wildtype	A:A	C:C	A:A	G:G
CHHOTI_LERMA	T:T	G:G	D	A:A	T:T	NA	A:A	G:G	G:G	null	C:C	G:G	C:C	A:A	C:C	NA	NA	T:T	Hobbit Sib:Hobbit Sib	T:T	C:C	G:G	1	A:A	C:C	wildtype:wildtype	A:A	C:C	C:C	C:C
Chinese_Spring	C:C	G:G	T	T:T	C:C	C:C	NA	G:G	G:G	null	C:C	G:G	C:C	A:A	C:C	A:A	S	T:T	Hobbit Sib:Hobbit Sib	C:C	C:C	G:G	0	A:A	C:C	wildtype:wildtype	A:A	C:C	C:C	G:G
CIGM881351_0B	C:C	G:G	T	A:A	T:T	C:C	NA	G:G	G:G	null	C:C	G:G	C:C	A:A	NA	A:A	NA	T:T	Hobbit Sib:Hobbit Sib	C:C	C:C	G:G	0	A:A	C:C	deletion:deletion	A:A	C:C	A:A	G:G
CIGM90561	C:C	G:G	T	A:A	T:T	NA	A:A	G:G	G:G	null	C:C	G:G	C:C	A:A	C:C	A:A	S	T:T	VPM1:VPM1	C:C	C:C	G:G	0	A:A	C:C	wildtype:wildtype	A:A	T:T	C:C	G:G
CIGM90812	C:C	G:G	T	A:A	T:T	C:C	A:A	G:G	G:G	null	C:C	G:G	C:C	A:A	NA	A:A	NA	T:T	Hobbit Sib:Hobbit Sib	C:C	C:C	G:G	0	A:A	C:C	wildtype:wildtype	A:A	C:C	C:C	G:G
CIGM921647	C:C	G:G	T	A:A	T:T	C:C	A:A	G:G	G:G	null	C:C	G:G	T:T	A:A	NA	A:A	NA	T:T	VPM1:VPM1	C:C	C:C	G:G	0	A:A	C:C	deletion:deletion	A:A	C:C	A:A	G:G
CIGM921666	T:T	G:G	D	A:A	T:T	C:C	A:A	G:G	A:A	2*	G:G	G:G	C:C	A:A	C:C	G:G	H	T:T	Hobbit Sib:Hobbit Sib	T:T	C:C	G:G	1	A:A	C:C	wildtype:wildtype	A:A	C:C	C:C	G:G
CIGM93388	C:C	G:G	T	A:A	T:T	C:C	A:A	G:G	G:A	2*	C:C	G:G	C:C	A:A	C:C	A:A	S	T:T	Hobbit Sib:Hobbit Sib	NA	C:C	G:G	NA	A:A	C:C	NA	A:A	C:C	A:C	G:G
Cinquentenario	C:C	G:G	T	A:A	T:T	C:C	A:A	G:G	A:A	2*	C:C	G:G	C:C	A:A	C:C	A:A	S	T:T	Hobbit Sib:Hobbit Sib	C:C	C:C	C:C	3	A:A	C:C	wildtype:wildtype	A:A	C:C	A:A	G:G
CNT_1	C:C	G:G	T	A:A	T:T	C:C	A:A	G:G	A:A	2*	C:C	G:G	C:C	A:A	C:C	A:A	S	T:T	Hobbit Sib:Hobbit Sib	T:T	C:C	G:G	1	A:A	C:C	wildtype:wildtype	A:A	C:C	C:C	G:G
CNT_10	C:C	G:G	T	A:A	T:T	NA	A:A	G:G	A:A	2*	C:C	G:G	C:C	A:A	C:C	A:A	S	T:T	Hobbit Sib:Hobbit Sib	C:C	C:C	C:C	3	A:A	C:C	wildtype:wildtype	A:A	C:C	A:A	G:G
CNT_7	C:C	G:G	T	A:A	T:T	C:C	A:A	G:G	A:A	2*	C:C	G:G	C:C	A:A	C:C	A:A	S	T:T	Hobbit Sib:Hobbit Sib	C:C	C:C	C:C	3	A:A	C:C	wildtype:wildtype	A:A	C:C	C:C	G:G
Colonista	C:C	G:G	T	A:A	T:T	C:C	A:A	G:G	A:A	2*	C:C	G:G	C:C	A:A	C:C	A:A	S	T:T	Hobbit Sib:Hobbit Sib	C:C	C:C	C:C	3	A:A	C:C	wildtype:wildtype	G:G	C:C	C:C	G:G
Confianca	C:C	G:G	T	T:T	C:C	NA	A:A	G:G	A:A	2*	C:C	G:G	T:T	A:A	C:C	G:G	H	T:T	Hobbit Sib:Hobbit Sib	C:C	C:C	G:G	0	A:A	C:C	wildtype:wildtype	A:A	C:C	C:C	G:G
Cotipora	C:C	G:G	T	T:T	C:C	C:C	A:A	G:G	G:G	null	C:C	G:G	C:C	A:A	C:C	A:A	S	T:T	Hobbit Sib:Hobbit Sib	T:T	C:C	G:G	1	A:A	C:C	wildtype:wildtype	A:A	C:C	C:C	G:G
COXILHA	C:C	G:G	T	A:A	T:T	C:C	A:A	G:G	A:A	2*	C:C	G:G	C:C	A:A	C:C	A:A	S	T:T	Hobbit Sib:Hobbit Sib	C:C	C:C	C:C	3	A:A	NA	wildtype:wildtype	A:A	C:C	A:A	C:C
CRUZ_ALTA	C:C	T:T	D	A:A	T:T	NA	A:A	G:G	A:A	2*	G:G	G:G	C:C	A:A	C:C	NA	NA	T:T	Hobbit Sib:Hobbit Sib	C:C	C:C	C:C	3	A:A	C:C	wildtype:wildtype	A:A	C:C	C:C	G:G
CRUZA_454	C:C	G:G	T	T:T	C:C	NA	A:A	G:G	A:A	2*	C:C	T:T	T:T	NA	C:C	A:A	S	C:C	Hobbit Sib:Hobbit Sib	C:C	C:C	C:C	3	A:A	C:C	wildtype:wildtype	G:G	C:C	C:C	G:G
Dom_Marco	C:C	G:G	T	A:A	T:T	C:C	A:A	G:G	A:A	2*	C:C	G:G	C:C	A:A	C:C	A:A	S	T:T	Hobbit Sib:Hobbit Sib	C:C	C:C	C:C	3	A:A	C:C	wildtype:wildtype	A:A	C:C	C:C	G:G
EMBRAPA_10	T:T	G:G	D	A:A	T:T	NA	A:A	A:A	A:A	1	G:G	G:G	C:C	A:A	C:C	G:G	H	T:T	Hobbit Sib:Hobbit Sib	T:T	C:C	G:G	1	A:A	C:C	wildtype:wildtype	A:A	C:C	C:C	G:G
EMBRAPA_22	T:T	G:G	D	T:T	C:C	C:C	A:A	A:A	A:A	1	G:G	G:G	C:C	A:A	C:C	G:G	H	T:T	Hobbit Sib:Hobbit Sib	T:T	C:C	G:G	1	C:C	C:C	wildtype:wildtype	G:G	C:C	C:C	G:G
EMBRAPA_27	T:T	G:G	D	A:A	T:T	NA	A:A	G:G	A:A	2*	C:C	G:G	C:C	A:A	C:C	A:A	S	T:T	Hobbit Sib:Hobbit Sib	C:C	C:C	C:C	3	A:A	C:C	wildtype:wildtype	A:A	C:C	C:C	G:G
EMBRAPA_27	T:T	G:G	D	A:A	T:T	NA	A:A	G:G	A:A	2*	C:C	G:G	C:C	A:A	C:C	A:A	S	T:T	Hobbit Sib:Hobbit Sib	C:C	C:C	C:C	3	A:A	C:C	wildtype:wildtype	A:A	C:C	C:C	G:G
EMBRAPA_40	C:C	G:G	T	A:A	T:T	NA	A:A	G:G	G:G	null	G:G	G:G	C:C	A:A	C:C	NA	NA	T:T	Hobbit Sib:Hobbit Sib	C:C	C:C	C:C	3	A:A	C:C	wildtype:wildtype	A:A	C:C	C:C	G:G
EMBRAPA_41	T:T	G:G	D	A:A	T:T	NA	A:A	A:A	A:A	1	G:G	G:G	C:C	A:A	C:C	A:A	S	T:T	Hobbit Sib:Hobbit Sib	T:T	C:C	G:G	1	A:A	C:C	wildtype:wildtype	G:G	C:C	C:C	G:G
EMBRAPA_42	C:C	T:T	D	A:A	T:T	NA	A:A	A:A	A:A	1	G:G	G:G	C:C	A:A	T:T	A:A	H	T:T	Hobbit Sib:Hobbit Sib	T:T	C:C	G:G	1	A:A	C:C	wildtype:wildtype	G:G	C:C	C:C	G:G
Erexim	C:C	G:G	T	T:T	C:C	C:C	A:A	G:G	G:G	null	C:C	G:G	C:C	A:A	C:C	A:A	S	C:C	Hobbit Sib:Hobbit Sib	C:C	C:C	C:C	3	A:A	C:C	wildtype:wildtype	A:A	C:C	C:C	C:C
Excalibur	C:C	T:T	D	A:A	T:T	C:C	A:A	G:G	A:A	2*	C:C	G:G	T:T	A:A	C:C	G:G	H	C:C	Hobbit Sib:Hobbit Sib	T:T	C:C	G:G	1	A:A	C:C	wildtype:wildtype	A:A	C:C	C:C	C:C
FB_4200	C:C	G:G	T	A:A	T:T	C:C	A:A	G:G	A:A	2*	G:G	G:G	C:C	A:A	T:T	A:A	H	T:T	Hobbit Sib:Hobbit Sib	C:C	C:C	C:C	3	A:A	C:C	wildtype:wildtype	G:G	C:C	C:C	G:G
FENG_MAI_11	C:C	G:G	T	A:A	T:T	NA	A:A	G:G	G:G	null	C:C	G:G	C:C	A:A	C:C	A:A	S	C:C	Hobbit Sib:Hobbit Sib	T:T	C:C	G:G	1	A:A	C:C	wildtype:wildtype	A:A	C:C	C:C	C:C
FEPAGRO_15	C:C	T:T	D	A:A	T:T	C:C	A:A	G:G	A:A	2*	G:G	G:G	C:C	A:A	C:C	A:A	S	T:T	Hobbit Sib:Hobbit Sib	C:C	C:C	C:C	3	A:A	NA	NA	A:A	C:C	A:A	G:G
Frontana	C:C	G:G	T	T:T	C:C	C:C	A:A	G:G	G:G	null	C:C	G:G	C:C	A:A	C:C	A:A	S	T:T	Hobbit Sib:Hobbit Sib	T:T	C:C	G:G	1	A:A	C:C	wildtype:wildtype	A:A	C:C	C:C	G:G
Fronteira	NA	G:G	NA	A:A	T:T	C:C	A:A	G:G	A:A	2*	C:C	G:G	C:C	A:A	C:C	A:A	S	T:T	Hobbit Sib:Hobbit Sib	C:C	C:C	C:C	3	A:A	C:C	wildtype:wildtype	A:A	C:C	A:A	G:G
FUNDACEP_30_825607	T:T	G:G	D	A:A	T:T	NA	A:A	A:A	A:A	1	C:C	T:T	C:C	NA	T:T	NA	H	C:C	Hobbit Sib:Hobbit Sib	T:T	NA	G:G	1	A:A	C:C	wildtype:wildtype	A:A	NA	A:A	G:G
FUNDACEP_30_825608	T:T	G:G	D	A:A	T:T	C:C	A:A	A:A	A:A	1	C:C	G:G	T:T	A:A	T:T	A:A	H	C:T	Hobbit Sib:Hobbit Sib	C:C	C:C	C:C	3	A:A	C:C	wildtype:wildtype	A:A	C:C	A:A	G:G
FUNDACEP_31	C:C	T:T	D	A:A	T:T	C:C	A:A	G:G	A:A	2*	G:G	G:G	T:T	A:A	C:C	A:A	S	T:T	Hobbit Sib:Hobbit Sib	T:T	C:C	G:G	1	A:A	C:C	wildtype:wildtype	A:A	T:T	C:C	G:G
FUNDACEP_36	T:T	G:G	D	A:A	T:T	NA	A:A	G:G	A:A	2*	C:C	G:G	C:C	NA	C:C	NA	NA	T:T	Hobbit Sib:Hobbit Sib	C:C	NA	C:C	3	A:A	NA	NA	A:A	C:C	C:C	C:C
FUNDACEP_37	T:T	G:G	D	A:A	T:T	C:C	A:A	G:G	A:A	2*	C:C	G:G	C:C	A:A	C:C	NA	NA	T:T	Hobbit Sib:Hobbit Sib	C:C	C:C	C:C	3	A:A	NA	NA	A:A	T:T	C:C	C:C
FUNDACEP_40	T:T	G:G	D	A:A	T:T	C:C	A:A	G:G	A:A	2*	G:G	G:G	C:C	A:A	C:C	A:A	S	T:T	Hobbit Sib:Hobbit Sib	T:T	C:C	G:G	1	A:A	NA	NA	A:A	C:C	C:C	G:G
FUNDACEP_51	C:C	G:G	T	A:A	T:T	C:C	A:A	G:G	A:A	2*	C:C	G:G	C:C	A:A	C:C	G:G	H	T:T	Hobbit Sib:Hobbit Sib	C:C	C:C	C:C	3	A:A	NA	NA	A:A	C:C	A:A	G:G
FUNDACEP_Bravo	T:T	G:G	D	A:A	T:T	NA	A:A	G:G	A:A	2*	C:C	G:G	C:C	A:A	C:C	G:G	H	T:T	Hobbit Sib:Hobbit Sib	C:C	C:C	C:C	3	A:A	NA	NA	A:A	T:T	C:C	G:G
FUNDACEP_Campo_Real	T:T	G:G	D	A:A	T:T	C:C	A:A	G:G	A:A	2*	C:C	G:G	C:C	A:A	C:C	A:A	S	T:T	Hobbit Sib:Hobbit Sib	C:C	C:C	C:C	3	A:A	C:C	wildtype:wildtype	A:A	C:C	A:A	G:G
FUNDACEP_Cristalino	T:T	G:G	D	A:A	T:T	C:C	A:A	G:G	A:A	2*	C:C	G:G	C:C	A:A	C:C	G:G	H	T:T	Hobbit Sib:Hobbit Sib	T:T	C:C	G:G	1	A:A	C:C	wildtype:wildtype	A:A	C:C	A:A	G:G
FUNDACEP_Horizonte	T:T	G:G	D	A:A	T:T	NA	A:A	G:G	A:A	2*	G:G	G:G	C:C	A:A	C:C	A:A	S	T:T	Hobbit Sib:Hobbit Sib	C:C	C:C	C:C	3	A:A	C:C	wildtype:wildtype	G:G	C:C	C:C	G:G
FUNDACEP_Nova_Era	C:C	T:T	D	A:A	T:T	NA	A:A	G:G	A:A	2*	C:C	G:G	C:C	A:A	C:C	G:G	H	T:T	Hobbit Sib:Hobbit Sib	C:C	C:C	C:C	3	A:A	NA	NA	A:A	C:C	A:A	G:G
FUNDACEP_Raizes	T:T	G:G	D	A:A	T:T	NA	A:A	G:G	A:A	2*	G:G	G:G	C:C	A:A	C:C	A:A	S	T:T	Hobbit Sib:Hobbit Sib	C:C	C:C	C:C	3	A:A	C:C	wildtype:wildtype	A:A	C:C	C:C	G:G
G_1179_37	NA	G:G	NA	A:A	T:T	NA	A:A	G:G	A:A	2*	C:C	G:G	C:C	A:A	C:C	A:A	S	T:T	Hobbit Sib:Hobbit Sib	C:C	C:C	C:C	3	A:A	C:C	wildtype:wildtype	A:A	C:C	A:A	G:G
Galego_Rapado	C:C	G:G	T	A:A	T:T	C:C	NA	A:A	A:A	1	C:C	G:G	C:C	A:A	C:C	A:A	S	T:T	Hobbit Sib:Hobbit Sib	C:C	C:C	C:C	3	C:C	C:C	wildtype:wildtype	A:A	C:C	A:A	G:G
GIGAS_1381	T:T	G:G	D	T:T	C:C	NA	A:A	G:G	A:A	2*	G:G	G:G	C:C	A:A	C:C	G:G	H	T:T	Hobbit Sib:Hobbit Sib	T:T	C:C	G:G	1	A:A	C:C	wildtype:wildtype	G:G	C:C	C:C	G:G
GRANAROLO	T:T	G:G	D	A:A	T:T	NA	A:A	G:G	G:G	null	C:C	G:G	C:C	A:A	C:C	A:A	S	C:C	Hobbit Sib:Hobbit Sib	T:T	C:C	G:G	1	A:A	C:C	wildtype:wildtype	A:A	T:T	C:C	G:G
Granito	T:T	G:G	D	A:A	T:T	NA	A:A	G:G	A:A	2*	G:G	G:G	C:C	A:A	C:C	G:G	H	T:T	Hobbit Sib:Hobbit Sib	C:C	C:C	C:C	3	A:A	C:C	wildtype:wildtype	A:A	T:T	C:C	G:G
GREECE_78310_A_3	C:C	G:G	T	T:T	C:C	C:C	NA	G:G	A:A	2*	C:C	G:G	C:C	A:A	C:C	A:A	S	T:T	Hobbit Sib:Hobbit Sib	T:T	C:C	G:G	1	A:A	C:C	wildtype:wildtype	G:G	C:C	C:C	G:G
GW_3	C:C	G:G	T	T:T	C:C	C:C	G:G	G:G	G:G	null	C:C	G:G	C:C	A:A	C:C	NA	NA	C:C	Hobbit Sib:Hobbit Sib	C:C	C:C	G:G	0	A:A	C:C	wildtype:wildtype	A:A	C:C	C:C	G:G
HAR604	NA	G:G	NA	A:A	T:T	C:C	A:A	A:A	A:A	1	G:G	G:G	C:C	A:A	C:C	G:G	H	T:T	Hobbit Sib:Hobbit Sib	T:T	C:C	G:G	1	C:C	C:C	wildtype:wildtype	A:A	T:T	C:C	G:G
HARTOG	C:C	T:T	D	A:A	T:T	C:C	A:A	A:A	A:A	1	G:G	G:G	C:C	A:A	C:C	G:G	H	T:T	Hobbit Sib:Hobbit Sib	T:T	C:C	G:G	1	A:A	C:C	wildtype:wildtype	A:A	C:C	C:C	G:G
Horto	C:C	G:G	T	A:A	T:T	C:C	A:A	G:G	A:A	2*	C:C	G:G	C:C	A:A	C:C	A:A	S	T:T	Hobbit Sib:Hobbit Sib	T:T	C:C	G:G	1	A:A	C:C	wildtype:wildtype	A:A	T:T	C:C	G:G
HUANCA	C:C	G:G	T	T:T	C:C	C:C	NA	G:G	A:A	2*	C:C	G:G	C:C	A:A	C:C	A:A	S	T:T	Hobbit Sib:Hobbit Sib	T:T	C:C	G:G	1	A:A	C:C	wildtype:wildtype	G:G	C:C	C:C	G:G
IAC_13	C:C	G:G	T	T:T	C:C	C:C	A:A	G:G	A:A	2*	C:C	G:G	C:C	A:A	C:C	A:A	S	T:T	Hobbit Sib:Hobbit Sib	T:T	C:C	G:G	1	A:A	C:C	wildtype:wildtype	A:A	C:C	A:A	G:G
IAC_21_IGUACU	C:C	G:G	T	T:T	C:C	C:C	A:A	G:G	A:A	2*	C:C	G:G	C:C	A:A	C:C	A:A	S	T:T	Hobbit Sib:Hobbit Sib	T:T	C:C	G:G	1	C:C	C:C	wildtype:wildtype	A:A	C:C	A:A	G:G
IAC_23_Tocantins	C:C	G:G	T	T:T	C:C	C:C	A:A	A:A	A:A	1	C:C	G:G	C:C	A:A	C:C	A:A	S	T:T	Hobbit Sib:Hobbit Sib	T:T	C:C	G:G	1	A:A	C:C	wildtype:wildtype	A:A	C:C	A:A	G:G
IAC_24_Tucurui	C:C	T:T	D	T:T	C:C	C:C	A:A	A:A	A:A	1	C:C	G:G	C:C	A:A	C:C	G:G	H	T:T	Hobbit Sib:Hobbit Sib	T:T	C:C	G:G	1	A:A	C:C	wildtype:wildtype	A:A	C:C	A:A	G:G
IAC_27_Pantaneiro	C:C	G:G	T	T:T	C:C	C:C	A:A	A:A	A:A	1	C:C	G:G	T:T	A:A	C:C	A:A	S	T:T	Hobbit Sib:Hobbit Sib	T:T	C:C	G:G	1	A:A	C:C	wildtype:wildtype	A:A	C:C	C:C	G:G
IAC_3_Anhanguera	C:C	G:G	T	T:T	C:C	C:C	A:A	G:G	G:G	null	C:C	G:G	C:C	A:A	C:C	A:A	S	T:T	Hobbit Sib:Hobbit Sib	T:T	C:C	G:G	1	A:A	C:C	wildtype:wildtype	A:A	C:C	A:A	G:G
IAC_370_Armagedon	T:T	G:G	D	A:A	T:T	C:C	A:A	G:G	A:A	2*	G:G	G:G	C:C	A:A	C:C	G:G	H	T:T	Hobbit Sib:Hobbit Sib	T:T	C:C	G:G	1	A:A	C:C	wildtype:wildtype	A:A	T:T	C:C	G:G
IAC_375_Parintins	C:C	T:T	D	A:A	T:T	C:C	A:A	G:G	A:A	2*	G:G	G:G	T:T	A:A	C:C	G:G	H	T:T	Hobbit Sib:Hobbit Sib	T:T	C:C	G:G	1	A:A	C:C	wildtype:wildtype	A:A	C:C	A:A	G:G
IAC_380_Saira	T:T	G:G	D	T:T	C:C	NA	A:A	A:A	A:A	1	G:G	G:G	C:C	A:A	C:C	A:A	S	T:T	Hobbit Sib:Hobbit Sib	T:T	C:C	G:G	1	A:A	C:C	wildtype:wildtype	A:A	C:C	C:C	G:G
IAC_381_Kuara	T:T	G:G	D	A:A	T:T	C:C	A:A	A:A	A:A	1	G:G	G:G	C:C	A:A	C:C	G:G	H	T:T	Hobbit Sib:Hobbit Sib	T:T	C:C	G:G	1	A:A	C:C	wildtype:wildtype	A:A	T:T	C:C	G:G
IAC_385_Mojave	T:T	G:G	D	T:T	C:C	NA	A:A	G:G	A:A	2*	G:G	G:G	C:C	A:A	C:C	A:A	S	T:T	Hobbit Sib:Hobbit Sib	T:T	C:C	G:G	1	A:A	C:C	wildtype:wildtype	A:A	T:T	C:C	G:G
IAC_5_Maringa	C:C	G:G	T	T:T	C:C	C:C	A:A	G:G	A:A	2*	C:C	G:G	C:C	A:A	C:C	A:A	S	T:T	Hobbit Sib:Hobbit Sib	T:T	C:C	G:G	1	C:C	C:C	wildtype:wildtype	A:A	C:C	A:A	NA
IAC_7_Bartira	C:C	G:G	T	A:A	T:T	C:C	A:A	G:G	A:A	2*	C:C	G:G	C:C	T:A	C:C	NA	NA	T:T	Hobbit Sib:Hobbit Sib	T:T	NA	G:G	1	A:A	C:C	wildtype:wildtype	A:A	C:C	C:C	G:G
IAC_7_Bartira	C:C	G:G	T	T:A	C:C	C:C	NA	G:G	A:A	2*	C:C	G:G	T:C	A:A	T:T	A:A	H	T:T	Hobbit Sib:Hobbit Sib	C:C	C:C	C:C	3	A:A	C:C	wildtype:wildtype	A:A	C:C	C:C	G:G
IAPAR_1_Mitacore	T:T	G:G	D	A:A	T:T	C:C	A:A	A:A	A:A	1	G:G	G:G	C:C	A:A	C:C	G:G	H	T:T	Hobbit Sib:Hobbit Sib	T:T	C:C	G:G	1	A:A	C:C	wildtype:wildtype	A:A	T:T	C:C	G:G
IAPAR_53	T:T	G:G	D	A:A	T:T	NA	A:A	A:A	A:A	1	C:C	G:G	C:C	A:A	C:C	G:G	H	T:T	Hobbit Sib:Hobbit Sib	T:T	C:C	G:G	1	A:A	C:C	wildtype:wildtype	A:A	T:T	C:C	G:G
IAPAR_6_Tapejara	C:C	T:T	D	T:T	C:C	C:C	A:A	G:G	A:A	2*	G:G	G:G	C:C	A:A	C:C	A:A	S	T:T	Hobbit Sib:Hobbit Sib	T:T	C:C	G:G	1	A:A	C:C	wildtype:wildtype	G:G	C:C	C:C	G:G
IAPAR_60	T:T	G:G	D	T:T	C:C	C:C	A:A	A:A	A:A	1	G:G	G:G	C:C	A:A	C:C	G:G	H	T:T	Hobbit Sib:Hobbit Sib	T:T	C:C	G:G	1	A:A	C:C	wildtype:wildtype	A:A	C:C	C:C	G:G
IAPAR_78	T:T	G:G	D	A:A	T:T	C:C	A:A	G:G	A:A	2*	C:C	G:G	C:C	A:A	C:C	G:G	H	T:T	Hobbit Sib:Hobbit Sib	T:T	C:C	G:G	1	A:A	C:C	wildtype:wildtype	A:A	T:T	C:C	G:G
IAS_15_Campeiro	C:C	G:G	T	A:A	T:T	C:C	A:A	G:G	A:A	2*	G:G	G:G	T:T	A:A	C:C	A:A	S	T:T	Hobbit Sib:Hobbit Sib	C:C	C:C	C:C	3	A:A	C:C	wildtype:wildtype	A:A	C:C	C:C	G:G
IAS_16_Cruz_Alta	C:C	G:G	T	A:A	T:T	C:C	A:A	G:G	A:A	2*	C:C	G:G	T:T	A:A	C:C	A:A	S	T:T	Hobbit Sib:Hobbit Sib	C:C	G:G	G:G	2	A:A	C:C	wildtype:wildtype	A:A	C:C	A:A	G:G
IAS_20_IASSUL_825610	C:C	G:G	T	A:A	T:T	NA	A:A	G:G	A:A	2*	C:C	G:G	T:T	A:A	C:C	A:A	S	T:T	Hobbit Sib:Hobbit Sib	C:C	C:C	C:C	3	A:A	C:C	wildtype:wildtype	A:A	C:C	A:A	G:G
IAS_20_IASSUL_825611	C:C	G:G	T	A:A	T:T	C:C	A:A	G:G	A:A	2*	C:C	G:G	T:T	A:A	C:C	A:A	S	T:T	Hobbit Sib:Hobbit Sib	C:C	C:C	C:C	3	A:A	C:C	wildtype:wildtype	A:A	C:C	C:C	G:G
IAS_51_Albatroz	C:C	G:G	T	A:A	T:T	C:C	A:A	G:G	A:A	2*	C:C	G:G	C:C	A:A	C:C	A:A	S	T:T	Hobbit Sib:Hobbit Sib	C:C	C:C	C:C	3	A:A	C:C	wildtype:wildtype	A:A	C:C	A:A	G:G
IAS_58	C:C	G:G	T	A:A	T:T	C:C	A:A	G:G	G:G	null	C:C	G:G	C:C	A:A	C:C	A:A	S	T:T	Hobbit Sib:Hobbit Sib	T:T	C:C	G:G	1	A:A	C:C	wildtype:wildtype	A:A	C:C	C:C	G:G
IAS_59	C:C	G:G	T	A:A	T:T	C:C	A:A	G:G	A:A	2*	G:G	G:G	C:C	A:A	C:C	A:A	S	T:T	Hobbit Sib:Hobbit Sib	C:C	C:C	C:C	3	A:A	C:C	wildtype:wildtype	A:A	C:C	A:A	G:G
IAS_62	C:C	G:G	T	A:A	T:T	C:C	A:A	G:G	A:A	2*	G:G	G:G	C:C	A:A	C:C	A:A	S	T:T	Hobbit Sib:Hobbit Sib	C:C	C:C	C:C	3	A:A	C:C	wildtype:wildtype	A:A	C:C	C:C	G:G
IAS_C46_Curitiba	C:C	G:G	T	A:A	T:T	C:C	A:A	G:G	A:A	2*	C:C	G:G	C:C	A:A	C:C	A:A	S	T:T	Hobbit Sib:Hobbit Sib	C:C	C:C	C:C	3	A:A	C:C	wildtype:wildtype	A:A	C:C	A:A	G:G
IPR_109	T:T	G:G	D	A:A	T:T	C:C	A:A	A:A	A:A	1	G:G	G:G	C:C	A:A	C:C	G:G	H	T:T	Hobbit Sib:Hobbit Sib	T:T	C:C	G:G	1	C:C	C:C	wildtype:wildtype	A:A	C:C	C:C	G:G
IPR_110	T:T	G:G	D	A:A	T:T	NA	A:A	G:G	A:A	2*	G:G	G:G	C:C	A:A	C:C	G:G	H	T:T	Hobbit Sib:Hobbit Sib	T:T	C:C	G:G	1	A:A	NA	NA	A:A	T:T	C:C	G:G
IPR_111	C:C	G:G	T	A:A	T:T	NA	A:A	G:G	G:G	null	NA	G:G	C:C	A:A	NA	NA	NA	T:T	Hobbit Sib:Hobbit Sib	C:C	C:C	NA	NA	A:A	C:C	wildtype:wildtype	A:A	C:C	A:A	G:G
IPR_118	C:C	G:G	T	A:A	T:T	NA	A:A	G:G	G:G	null	C:C	G:G	C:C	A:A	NA	NA	NA	T:T	Hobbit Sib:Hobbit Sib	C:C	NA	NA	NA	A:A	C:C	wildtype:wildtype	A:A	C:C	A:A	G:G
IPR_128	T:T	G:G	D	A:A	T:T	C:C	A:A	A:A	A:A	1	G:G	G:G	C:C	A:A	C:C	G:G	H	T:T	Hobbit Sib:Hobbit Sib	T:T	C:C	G:G	1	C:C	C:C	wildtype:wildtype	A:A	C:C	C:C	G:G
IPR_129	T:T	G:G	D	A:A	T:T	C:C	A:A	A:A	A:A	1	G:G	G:G	C:C	A:A	C:C	G:G	H	T:T	Hobbit Sib:Hobbit Sib	T:T	C:C	NA	1	C:C	C:C	wildtype:wildtype	A:A	T:T	C:C	C:C
IPR_136	T:T	G:G	D	A:A	T:T	NA	A:A	G:G	A:A	2*	G:G	G:G	C:C	A:A	C:C	G:G	H	T:T	Hobbit Sib:Hobbit Sib	T:T	C:C	G:G	1	C:C	C:C	wildtype:wildtype	A:A	T:T	C:C	G:G
IPR_144	T:T	G:G	D	A:A	T:T	NA	A:A	A:A	A:A	1	G:G	G:G	C:C	A:A	C:C	G:G	H	T:T	Hobbit Sib:Hobbit Sib	T:T	C:C	G:G	1	A:A	C:C	wildtype:wildtype	A:A	T:T	C:C	G:G
IPR_84	C:C	T:T	D	A:A	T:T	NA	A:A	G:G	A:A	2*	G:G	G:G	C:C	A:A	T:T	A:A	H	T:T	Hobbit Sib:Hobbit Sib	C:C	C:C	C:C	3	A:A	NA	NA	A:A	C:C	A:A	G:G
IPR_85	C:C	T:T	D	A:A	T:T	C:C	A:A	A:A	A:A	1	G:G	G:G	C:C	A:A	C:C	G:G	H	T:T	Hobbit Sib:Hobbit Sib	T:T	C:C	G:G	1	C:C	C:C	wildtype:wildtype	A:A	C:C	C:C	G:G
IPR_87	T:T	G:G	D	T:T	C:C	C:C	A:A	A:A	A:A	1	C:C	G:G	C:C	A:A	C:C	G:G	H	T:T	Hobbit Sib:Hobbit Sib	T:T	C:C	G:G	1	C:C	C:C	wildtype:wildtype	A:A	T:T	C:C	G:G
IPR_Catuara_TM	C:C	T:T	D	A:A	T:T	C:C	A:A	A:A	A:A	1	G:G	G:G	C:C	A:A	C:C	G:G	H	T:T	Hobbit Sib:Hobbit Sib	T:T	C:C	G:G	1	C:C	C:C	wildtype:wildtype	A:A	C:C	C:C	C:C
ITAPUA_50_AMISTAD	T:T	G:G	D	A:A	T:T	C:C	A:A	A:A	A:A	1	G:G	G:G	C:C	A:A	C:C	A:A	S	T:T	Hobbit Sib:Hobbit Sib	C:C	C:C	C:C	3	A:A	NA	NA	A:A	C:C	A:A	G:G
ITAPUA_65_Don_Valerio	T:T	G:G	D	T:T	C:C	C:C	A:A	G:G	A:A	2*	G:G	G:G	C:C	A:A	C:C	G:G	H	T:T	Hobbit Sib:Hobbit Sib	T:T	C:C	G:G	1	C:C	C:C	wildtype:wildtype	A:A	C:C	C:C	C:C
JACUI	C:C	G:G	T	A:A	T:T	NA	A:A	G:G	A:A	2*	C:C	G:G	C:C	A:A	C:C	A:A	S	T:T	Hobbit Sib:Hobbit Sib	C:C	C:C	C:C	3	A:A	C:C	wildtype:wildtype	A:A	C:C	A:A	G:G
Jadeite_11	T:T	G:G	D	A:A	T:T	NA	A:A	G:G	A:A	2*	G:G	G:G	C:C	A:A	C:C	G:G	H	T:T	Hobbit Sib:Hobbit Sib	C:C	C:C	C:C	3	A:A	C:C	wildtype:wildtype	A:A	C:C	A:A	G:G
JANZ	T:T	G:G	D	T:T	C:C	NA	A:A	A:A	A:A	1	C:C	G:G	C:C	A:A	T:T	A:A	H	T:T	Hobbit Sib:Hobbit Sib	T:T	C:C	G:G	1	A:A	C:C	wildtype:wildtype	G:G	C:C	C:C	G:G
Jaspe	T:T	G:G	D	A:A	T:T	C:C	A:A	A:A	A:A	1	G:G	G:G	C:C	A:A	C:C	G:G	H	T:T	Hobbit Sib:Hobbit Sib	C:C	C:C	C:C	3	A:A	C:C	wildtype:wildtype	A:A	C:C	C:C	G:G
Jesuita	C:C	G:G	T	A:A	T:T	C:C	A:A	G:G	A:A	2*	G:G	G:G	C:C	A:A	C:C	A:A	S	T:T	Hobbit Sib:Hobbit Sib	C:C	C:C	C:C	3	A:A	C:C	wildtype:wildtype	A:A	C:C	A:A	G:G
JUBILÉ	T:T	G:G	D	A:A	T:T	C:C	A:A	G:G	G:G	null	C:C	G:G	C:C	A:A	C:C	A:A	S	T:T	Hobbit Sib:Hobbit Sib	T:T	C:C	G:G	1	A:A	C:C	wildtype:wildtype	A:A	C:C	A:A	G:G
JUBILEE	T:T	G:G	D	A:A	T:T	C:C	A:A	G:G	G:G	null	C:C	G:G	C:C	A:A	C:C	A:A	S	T:T	Hobbit Sib:Hobbit Sib	T:T	C:C	G:G	1	A:A	C:C	wildtype:wildtype	A:A	C:C	A:A	G:G
JUP_73	T:T	G:G	D	A:A	T:T	NA	A:A	G:G	A:A	2*	C:C	G:G	C:C	A:A	C:C	G:G	H	T:T	Hobbit Sib:Hobbit Sib	T:T	C:C	C:G	1	A:A	C:C	wildtype:wildtype	A:A	C:C	C:C	G:G
KARAMU	T:T	G:G	D	T:T	C:C	NA	A:A	G:G	G:G	null	C:C	G:G	C:C	A:A	T:T	A:A	H	T:T	Hobbit Sib:Hobbit Sib	T:T	C:C	G:G	1	A:A	C:C	wildtype:wildtype	G:G	C:C	C:C	G:G
KARINA_10	T:T	G:G	D	A:A	T:T	C:C	A:A	G:G	G:G	null	NA	G:G	C:C	A:A	T:T	NA	H	T:T	Hobbit Sib:Hobbit Sib	NA	NA	C:G	NA	A:A	C:C	deletion:deletion	A:A	C:C	C:C	G:G
KENYA_Farmer	C:C	G:G	T	A:A	T:T	NA	A:A	G:G	A:A	2*	G:G	G:G	T:T	A:A	C:C	A:A	S	T:T	Hobbit Sib:Hobbit Sib	C:C	C:C	NA	NA	A:A	C:C	wildtype:wildtype	A:A	C:C	C:C	G:G
Kleiber	C:C	G:G	T	A:A	T:T	C:C	A:A	A:A	A:A	1	G:G	G:G	T:T	A:A	C:C	A:A	S	T:T	Hobbit Sib:Hobbit Sib	C:C	C:C	C:C	3	A:A	C:C	wildtype:wildtype	G:G	C:C	C:C	G:G
KLEIN_Atlas	C:C	G:G	T	A:A	T:T	NA	A:A	A:A	A:A	1	C:C	G:G	T:T	A:A	C:C	A:A	S	T:T	Hobbit Sib:Hobbit Sib	T:T	C:C	G:G	1	A:A	C:C	wildtype:wildtype	A:A	C:C	C:C	G:G
KLEIN_Lucero_825635	C:C	G:G	T	A:A	T:T	C:C	A:A	G:G	A:A	2*	C:C	G:G	C:C	A:A	C:C	A:A	S	T:T	Hobbit Sib:Hobbit Sib	C:C	C:C	C:C	3	A:A	C:C	wildtype:wildtype	A:A	T:T	C:C	G:G
KLEIN_Lucero_825678	C:C	G:G	T	A:A	T:T	C:C	A:A	G:G	A:A	2*	C:C	G:G	C:C	A:A	C:C	A:A	S	T:T	Hobbit Sib:Hobbit Sib	C:C	C:C	C:C	3	A:A	C:C	wildtype:wildtype	A:A	T:T	C:C	G:G
KOSE	C:C	G:G	T	A:A	T:T	C:C	A:A	G:G	A:A	2*	C:C	G:G	T:T	A:A	C:C	A:A	S	T:T	Hobbit Sib:Hobbit Sib	C:C	C:C	C:C	3	A:A	C:C	wildtype:wildtype	A:A	T:T	C:C	G:G
Lagoa_Vermelha	C:C	G:G	T	A:A	T:T	C:C	A:A	G:G	G:G	null	C:C	G:G	C:C	A:A	C:C	A:A	S	T:T	Hobbit Sib:Hobbit Sib	T:T	C:C	G:G	1	A:A	C:C	wildtype:wildtype	A:A	C:C	C:C	NA
Londrina_825614	T:T	G:G	D	A:A	T:T	NA	A:A	A:A	A:A	1	C:C	G:G	C:C	A:A	C:C	A:A	S	T:T	Hobbit Sib:Hobbit Sib	C:C	C:C	C:C	3	A:A	C:C	wildtype:wildtype	A:A	C:C	C:C	C:C
LOVRIN_13	C:C	G:G	T	A:A	T:T	NA	A:A	G:G	A:A	2*	G:G	G:G	C:C	A:A	C:C	A:A	S	T:T	Hobbit Sib:Hobbit Sib	T:T	C:C	G:G	1	A:A	C:C	wildtype:wildtype	A:A	C:C	C:C	G:G
LR_6044	C:C	G:G	T	A:A	T:T	NA	A:A	G:G	A:A	2*	G:G	G:G	C:C	A:A	T:T	A:A	H	T:T	Hobbit Sib:Hobbit Sib	C:C	C:C	C:C	3	A:A	C:C	wildtype:wildtype	G:G	C:C	C:C	G:G
M6_SYNTHETIC	T:T	G:G	D	A:A	T:T	C:C	A:A	G:G	A:A	2*	C:C	G:G	C:C	A:A	NA	A:A	NA	T:T	Hobbit Sib:Hobbit Sib	T:T	C:C	G:G	1	A:A	C:C	deletion:deletion	A:A	C:C	C:C	G:G
MAITEN_INIA	T:T	G:G	D	T:T	C:C	C:C	A:A	G:G	A:A	2*	C:C	G:G	T:T	A:A	C:C	G:G	H	T:T	Hobbit Sib:Hobbit Sib	T:T	C:C	G:G	1	A:A	C:C	wildtype:wildtype	G:G	C:C	C:C	G:G
Marfim	T:T	G:G	D	A:A	T:T	C:C	A:A	G:G	A:A	2*	G:G	G:G	C:C	A:A	C:C	A:A	S	T:T	Hobbit Sib:Hobbit Sib	C:C	G:G	G:G	2	A:A	C:C	wildtype:wildtype	A:A	T:T	C:C	G:G
Maya_74	C:C	G:G	T	A:A	T:T	C:C	A:A	G:G	A:A	2*	C:C	G:G	T:T	A:A	T:T	A:A	H	T:T	Hobbit Sib:Hobbit Sib	C:C	G:G	G:G	2	A:A	C:C	wildtype:wildtype	A:A	C:C	A:A	G:G
Melchior	C:C	G:G	T	A:A	T:T	C:C	A:A	G:G	A:A	2*	G:G	G:G	C:C	A:A	C:C	A:A	S	T:T	Hobbit Sib:Hobbit Sib	C:C	C:C	C:C	3	A:A	C:C	wildtype:wildtype	A:A	C:C	A:A	G:G
MENCEKI	C:C	G:G	T	A:A	NA	C:C	A:A	G:G	A:A	2*	G:G	G:G	C:C	A:A	C:C	A:A	S	T:T	Hobbit Sib:Hobbit Sib	C:C	C:C	C:C	3	A:A	C:C	wildtype:wildtype	A:A	C:C	A:A	NA
MENTANA	T:T	G:G	D	A:A	T:T	NA	A:A	A:A	A:A	1	C:C	G:G	C:C	A:A	C:C	G:G	H	T:T	Hobbit Sib:Hobbit Sib	C:C	C:C	C:C	3	A:A	C:C	wildtype:wildtype	A:A	C:C	A:A	NA
MG_1	C:C	G:G	T	A:A	T:T	NA	A:A	G:G	A:A	2*	G:G	G:G	C:C	A:A	C:C	A:A	S	T:T	Hobbit Sib:Hobbit Sib	T:T	C:C	G:G	1	A:A	C:C	wildtype:wildtype	G:G	C:C	C:C	G:G
MINUANO	C:C	G:G	T	A:A	T:T	C:C	A:A	G:G	A:A	2*	C:C	G:G	C:C	A:A	C:C	A:A	S	T:T	Hobbit Sib:Hobbit Sib	C:C	C:C	C:C	3	C:C	C:C	wildtype:wildtype	G:G	C:C	C:C	G:G
Minuano_82	C:C	G:G	T	T:T	C:C	C:C	A:A	G:G	A:A	2*	C:C	G:G	C:C	A:A	C:C	A:A	S	T:T	Hobbit Sib:Hobbit Sib	T:T	C:C	G:G	1	A:A	C:C	wildtype:wildtype	A:A	C:C	C:C	G:G
Mirante	T:T	G:G	D	A:A	T:T	NA	A:A	G:G	A:A	2*	G:G	G:G	C:C	A:A	C:C	G:G	H	T:T	Hobbit Sib:Hobbit Sib	C:C	C:C	C:C	3	A:A	C:C	wildtype:wildtype	A:A	C:C	C:C	G:G
MONEBO	C:C	T:T	D	A:A	T:T	C:C	A:A	A:A	A:A	1	G:G	G:G	C:C	A:A	C:C	G:G	H	T:T	Hobbit Sib:Hobbit Sib	T:T	C:C	G:G	1	A:A	C:C	wildtype:wildtype	A:A	C:C	A:A	G:G
MONTES_CLAROS	C:C	G:G	T	A:A	T:T	C:C	A:A	G:G	A:A	2*	C:C	G:G	C:C	A:A	C:C	A:A	S	T:T	Hobbit Sib:Hobbit Sib	C:C	C:C	C:C	3	NA	C:C	wildtype:wildtype	G:G	C:C	C:C	G:G
Morocco	T:T	G:G	D	A:A	T:T	C:C	A:A	A:A	A:A	1	G:G	G:G	C:C	A:A	C:C	G:G	H	T:T	Hobbit Sib:Hobbit Sib	T:T	C:C	G:G	1	A:A	C:C	wildtype:wildtype	G:G	C:C	C:C	G:G
Nanbu	C:C	T:T	D	T:T	C:C	NA	A:A	A:A	A:A	1	G:G	G:G	T:T	A:A	C:C	G:G	H	T:T	Hobbit Sib:Hobbit Sib	C:C	C:C	G:G	0	A:A	C:C	wildtype:wildtype	G:G	C:C	C:C	G:G
Narino_59_825562	C:C	G:G	T	T:T	C:C	NA	A:A	G:G	G:G	null	G:G	G:G	C:C	A:A	C:C	A:A	S	T:T	Hobbit Sib:Hobbit Sib	T:T	C:C	G:G	1	A:A	C:C	wildtype:wildtype	A:A	C:C	A:A	G:G
ND_71_12_131	T:T	G:G	D	A:A	T:T	NA	A:A	G:G	A:A	2*	G:G	G:G	T:T	A:A	T:T	A:A	H	T:T	Hobbit Sib:Hobbit Sib	C:C	C:C	C:C	3	A:A	C:C	wildtype:wildtype	G:G	C:C	C:C	G:G
Neepawa	C:C	G:G	T	A:A	T:T	NA	A:A	G:G	A:A	2*	G:G	G:G	C:C	A:A	T:T	A:A	H	T:T	Hobbit Sib:Hobbit Sib	C:C	C:C	C:C	3	A:A	C:C	wildtype:wildtype	G:G	C:C	C:C	G:G
NING_44N1406	C:C	T:T	D	A:A	T:T	NA	A:A	A:A	A:A	1	G:G	G:G	C:C	A:A	T:T	A:A	H	T:T	Hobbit Sib:Hobbit Sib	T:T	C:C	G:G	1	A:A	C:C	wildtype:wildtype	G:G	C:C	C:C	G:G
NOBEOKA_BOZU	C:C	G:G	T	T:T	C:C	C:C	G:G	G:G	G:G	null	C:C	G:G	C:C	A:A	C:C	NA	NA	C:C	Hobbit Sib:Hobbit Sib	C:C	C:C	G:G	0	A:A	C:C	wildtype:wildtype	A:A	C:C	C:C	G:G
Nobre	C:C	G:G	T	T:T	C:C	NA	A:A	G:G	A:A	2*	C:C	G:G	C:C	A:A	C:C	A:A	S	C:C	Hobbit Sib:Hobbit Sib	T:T	C:C	G:G	1	A:A	C:C	wildtype:wildtype	A:A	C:C	C:C	G:G
NP_790	C:C	G:G	T	A:A	T:T	NA	A:A	G:G	A:A	2*	G:G	G:G	T:T	A:A	C:C	A:A	S	C:C	Hobbit Sib:Hobbit Sib	C:C	C:C	C:C	3	A:A	C:C	wildtype:wildtype	G:G	C:C	C:C	G:G
NURI_70	C:C	G:G	T	T:T	C:C	C:C	G:G	G:G	G:G	null	C:C	G:G	C:C	A:A	C:C	NA	NA	C:C	Hobbit Sib:Hobbit Sib	C:C	C:C	G:G	0	A:A	C:C	wildtype:wildtype	A:A	C:C	C:C	G:G
NYUBAY	NA	G:G	NA	T:T	C:C	C:C	G:G	G:G	G:G	null	C:C	G:G	C:C	A:A	C:C	G:G	H	C:C	Hobbit Sib:Hobbit Sib	C:C	C:C	G:G	0	A:A	C:C	wildtype:wildtype	A:A	C:C	C:C	G:G
OC_8154	C:C	T:T	D	T:T	C:C	NA	A:A	G:G	A:A	2*	C:C	G:G	C:C	A:A	C:C	G:G	H	T:T	Hobbit Sib:Hobbit Sib	T:T	C:C	G:G	1	A:A	C:C	wildtype:wildtype	A:A	C:C	A:A	G:G
OCEPAR_10_Garca	T:T	G:G	D	T:T	C:C	C:C	NA	A:A	A:A	1	G:G	G:G	C:C	A:A	C:C	A:A	S	T:T	Hobbit Sib:Hobbit Sib	T:T	C:C	G:G	1	A:A	C:C	wildtype:wildtype	A:A	C:C	A:A	G:G
OCEPAR_12_Maitaca	C:C	G:G	T	A:A	T:T	NA	A:A	G:G	A:A	2*	C:C	G:G	C:C	A:A	C:C	A:A	S	T:T	Hobbit Sib:Hobbit Sib	T:T	C:C	G:G	1	A:A	C:C	wildtype:wildtype	G:G	C:C	C:C	C:C
OCEPAR_14	T:T	G:G	D	T:T	C:C	NA	A:A	A:A	A:A	1	G:G	G:G	C:C	A:A	T:T	A:A	H	T:T	Hobbit Sib:Hobbit Sib	T:T	C:C	G:G	1	A:A	C:C	wildtype:wildtype	A:A	C:C	C:C	G:G
OCEPAR_16	T:T	G:G	D	T:T	C:C	NA	A:A	G:G	A:A	2*	G:G	G:G	C:C	A:A	C:C	G:G	H	T:T	Hobbit Sib:Hobbit Sib	T:T	C:C	G:G	1	C:C	C:C	wildtype:wildtype	A:A	C:C	C:C	G:G
OCEPAR_17	C:C	T:T	D	T:T	C:C	NA	A:A	A:A	A:A	1	G:G	G:G	C:C	A:A	C:C	G:G	H	T:T	Hobbit Sib:Hobbit Sib	T:T	C:C	G:G	1	A:A	C:C	wildtype:wildtype	A:A	C:C	A:A	NA
OCEPAR_18	T:T	G:G	D	A:A	T:T	C:C	A:A	A:A	A:A	1	G:G	G:G	C:C	A:A	C:C	G:G	H	T:T	Hobbit Sib:Hobbit Sib	T:T	C:C	G:G	1	C:C	C:C	wildtype:wildtype	A:A	T:T	C:C	G:G
OCEPAR_7_Batuira	C:C	T:T	D	T:T	C:C	NA	A:A	A:A	A:A	1	G:G	G:G	C:C	A:A	C:C	G:G	H	T:T	Hobbit Sib:Hobbit Sib	T:T	C:C	G:G	1	A:A	C:C	wildtype:wildtype	G:G	C:C	C:C	G:G
OCEPAR_9_Perdiz	C:C	T:T	D	A:A	T:T	C:C	A:A	G:G	A:A	2*	G:G	G:G	C:C	A:A	C:C	A:A	S	T:T	Hobbit Sib:Hobbit Sib	T:T	C:C	C:G	1	A:A	C:C	wildtype:wildtype	A:A	C:C	C:C	G:G
ONIX	T:T	G:G	D	A:A	T:T	NA	A:A	G:G	A:A	2*	G:G	G:G	C:C	A:A	C:C	G:G	H	T:T	Hobbit Sib:Hobbit Sib	C:C	C:C	C:C	3	A:A	C:C	wildtype:wildtype	A:A	C:C	C:C	NA
OPATA_85	T:T	G:G	D	T:T	C:C	C:C	A:A	G:G	A:A	2*	C:C	G:G	C:C	A:A	C:C	G:G	H	T:T	Hobbit Sib:Hobbit Sib	T:T	C:C	G:G	1	A:A	C:C	wildtype:wildtype	A:A	C:C	C:C	G:G
OR_1	T:T	G:G	D	A:A	T:T	C:C	A:A	G:G	A:A	2*	C:C	G:G	C:C	A:A	C:C	G:G	H	T:T	Hobbit Sib:Hobbit Sib	T:T	C:C	G:G	1	A:A	C:C	wildtype:wildtype	A:A	T:T	C:C	G:G
Pampeano_INTA	C:C	T:T	D	T:T	C:C	NA	A:A	G:G	A:A	2*	G:G	G:G	T:T	A:A	C:C	G:G	H	T:T	Hobbit Sib:Hobbit Sib	T:T	C:C	G:G	1	A:A	C:C	wildtype:wildtype	G:G	C:C	C:C	G:G
Panda	T:T	G:G	D	A:A	T:T	NA	A:A	A:A	NA	NA	G:G	G:G	C:C	A:A	C:C	G:G	H	T:T	Hobbit Sib:Hobbit Sib	T:T	C:C	G:G	1	A:A	C:C	wildtype:wildtype	A:A	C:C	C:C	G:G
Paraguai_281	C:C	G:G	T	T:T	C:C	NA	A:A	G:G	A:A	2*	C:C	G:G	T:T	A:A	C:C	G:G	H	T:T	Hobbit Sib:Hobbit Sib	C:C	C:C	G:G	0	A:A	C:C	wildtype:wildtype	A:A	C:C	C:C	G:G
PAT_18	C:C	G:G	T	T:T	C:C	C:C	A:A	G:G	G:G	null	C:C	G:G	C:C	A:A	C:C	A:A	S	T:T	Hobbit Sib:Hobbit Sib	T:T	C:C	G:G	1	A:A	C:C	wildtype:wildtype	A:A	C:C	C:C	G:G
PAT_7392	T:T	G:G	D	A:A	T:T	C:C	A:A	A:A	A:A	1	G:G	G:G	T:T	A:A	T:T	A:A	H	T:T	Hobbit Sib:Hobbit Sib	C:C	G:G	G:G	2	A:A	C:C	wildtype:wildtype	A:A	C:C	C:C	C:C
Patriarca	C:C	G:G	T	T:T	C:C	C:C	A:A	G:G	G:G	null	C:C	G:G	C:C	A:A	C:C	A:A	S	T:T	Hobbit Sib:Hobbit Sib	T:T	C:C	G:G	1	A:A	C:C	wildtype:wildtype	A:A	C:C	C:C	G:G
PEkING_8_825671	C:C	G:G	T	T:T	C:C	C:C	G:G	G:G	G:G	null	C:C	G:G	C:C	A:A	C:C	A:A	S	C:C	Hobbit Sib:Hobbit Sib	C:C	C:C	G:G	0	A:A	C:C	wildtype:wildtype	A:A	C:C	C:C	G:G
Peladinho	C:C	G:G	T	T:T	C:C	C:C	G:G	G:G	A:A	2*	C:C	G:G	C:C	A:A	C:C	A:A	S	C:C	Hobbit Sib:Hobbit Sib	T:T	C:C	G:G	1	A:A	C:C	wildtype:wildtype	A:A	C:C	A:A	G:G
PEQUING_8_825671	C:C	G:G	T	T:T	C:C	C:C	NA	A:A	A:A	1	C:C	G:G	T:T	A:A	C:C	A:A	S	C:C	Hobbit Sib:Hobbit Sib	C:C	C:C	G:G	0	A:A	C:C	wildtype:wildtype	A:A	C:C	C:C	G:G
PG_1	C:C	G:G	T	A:A	T:T	C:C	A:A	G:G	A:A	2*	C:C	G:G	C:C	A:A	C:C	A:A	S	T:T	Hobbit Sib:Hobbit Sib	C:C	C:C	C:C	3	A:A	C:C	wildtype:wildtype	A:A	C:C	A:A	G:G
PHABING	C:C	G:G	T	A:A	T:T	C:C	G:G	G:G	G:G	null	C:C	G:G	C:C	A:A	C:C	A:A	S	C:C	Hobbit Sib:Hobbit Sib	C:C	C:C	G:G	0	A:A	C:C	wildtype:wildtype	A:A	C:C	C:C	G:G
PI_181337	C:C	G:G	T	T:T	C:C	C:C	NA	G:G	A:A	2*	G:G	G:G	C:C	A:A	T:T	A:A	H	C:C	Hobbit Sib:Hobbit Sib	C:C	C:C	G:G	0	A:A	C:C	wildtype:wildtype	G:G	C:C	C:C	G:G
Pilancho_80	T:T	G:G	D	A:A	T:T	C:C	A:A	G:G	A:A	2*	G:G	G:G	C:C	A:A	C:C	G:G	H	T:T	Hobbit Sib:Hobbit Sib	T:T	C:C	G:G	1	A:A	C:C	wildtype:wildtype	G:G	C:C	C:C	G:G
Precoz_Parana_INTA	C:C	T:T	D	A:A	T:T	NA	A:A	G:G	A:A	2*	G:G	G:G	C:C	A:A	T:T	A:A	H	T:T	Hobbit Sib:Hobbit Sib	T:T	C:C	G:G	1	A:A	C:C	wildtype:wildtype	G:G	C:C	C:C	G:G
Quartz	T:T	G:G	D	A:A	T:T	NA	A:A	A:A	A:A	1	G:G	G:G	C:C	A:A	C:C	G:G	H	T:T	Hobbit Sib:Hobbit Sib	C:C	C:C	C:C	3	A:A	C:C	wildtype:wildtype	A:A	T:T	C:C	G:G
Quartzo_red_2	T:T	NA	D	A:A	T:T	NA	A:A	A:A	A:A	1	G:G	NA	C:C	A:A	C:C	G:G	H	T:T	Hobbit Sib:Hobbit Sib	C:C	C:C	C:C	3	A:A	C:C	wildtype:wildtype	A:A	T:T	C:C	G:G
Rayon_FN_89	C:C	T:T	D	T:T	C:C	NA	A:A	G:G	A:A	2*	C:C	G:G	C:C	A:A	C:C	G:G	H	T:T	Hobbit Sib:Hobbit Sib	T:T	C:C	G:G	1	A:A	C:C	wildtype:wildtype	A:A	C:C	C:C	G:G
RELIN	C:C	G:G	T	A:A	T:T	C:C	NA	A:A	A:A	1	G:G	G:G	T:T	A:A	C:C	A:A	S	T:T	Hobbit Sib:Hobbit Sib	C:C	G:G	G:G	2	A:A	C:C	wildtype:wildtype	G:G	C:C	C:C	G:G
Rio_Sulino	C:C	G:G	T	NA	T:T	C:C	A:A	G:G	A:A	2*	C:C	G:G	T:T	A:A	C:C	A:A	S	T:T	Hobbit Sib:Hobbit Sib	C:C	C:C	C:C	3	A:A	C:C	wildtype:wildtype	G:G	C:C	C:C	G:G
RS_15	C:C	T:T	D	A:A	T:T	C:C	A:A	G:G	A:A	2*	G:G	G:G	C:C	A:A	C:C	A:A	S	T:T	Hobbit Sib:Hobbit Sib	C:C	C:C	C:C	3	A:A	NA	wildtype:wildtype	A:A	C:C	A:A	G:G
RS_1_FENIX	C:C	G:G	T	A:A	T:T	C:C	A:A	G:G	G:G	null	G:G	G:G	C:C	A:A	C:C	A:A	S	T:T	Hobbit Sib:Hobbit Sib	T:T	C:C	G:G	1	C:C	C:C	wildtype:wildtype	A:A	C:C	A:A	C:C
RS_2_SANTA_MARIA	C:C	G:G	T	A:A	T:T	C:C	A:A	G:G	G:G	null	G:G	G:G	C:C	A:A	C:C	A:A	S	T:T	Hobbit Sib:Hobbit Sib	T:T	C:C	G:G	1	C:C	C:C	wildtype:wildtype	A:A	C:C	A:A	C:C
RS_8_Westphalen	C:C	G:G	T	T:T	C:C	C:C	A:A	G:G	A:A	2*	C:C	G:G	C:C	A:A	C:C	A:A	S	T:T	Hobbit Sib:Hobbit Sib	C:C	C:C	C:C	3	A:A	C:C	wildtype:wildtype	A:A	C:C	A:A	C:C
Rubi	T:T	G:G	D	A:A	T:T	C:C	A:A	G:G	G:G	null	G:G	G:G	C:C	A:A	C:C	A:A	S	T:T	Hobbit Sib:Hobbit Sib	C:C	C:C	C:C	3	C:C	C:C	wildtype:wildtype	A:A	C:C	A:A	G:G
Ruminahui	C:C	G:G	T	A:A	T:T	C:C	NA	G:G	A:A	2*	C:C	G:G	C:C	A:A	C:C	A:A	S	T:T	Hobbit Sib:Hobbit Sib	C:C	C:C	C:C	3	A:A	C:C	wildtype:wildtype	G:G	C:C	C:C	G:G
S_12	C:C	G:G	T	A:A	T:T	C:C	A:A	G:G	G:G	null	C:C	G:G	C:C	A:A	C:C	A:A	S	T:T	Hobbit Sib:Hobbit Sib	T:T	C:C	G:G	1	A:A	C:C	wildtype:wildtype	A:A	C:C	A:A	G:G
Safira	T:T	G:G	D	A:A	T:T	NA	A:A	G:G	A:A	2*	G:G	G:G	C:C	A:A	C:C	G:G	H	T:T	Hobbit Sib:Hobbit Sib	C:C	C:C	C:C	3	A:A	C:C	wildtype:wildtype	A:A	T:T	C:C	G:G
SAIKAI_165	T:T	G:G	D	T:T	C:C	G:G	G:G	G:G	G:G	null	C:C	G:G	T:T	A:A	C:C	A:A	S	C:C	Hobbit Sib:Hobbit Sib	T:T	C:C	G:G	1	A:A	C:C	wildtype:wildtype	A:A	C:C	C:C	G:G
SALCANTAY	C:C	G:G	T	A:A	T:T	C:C	A:A	G:G	A:A	2*	C:C	G:G	C:C	A:A	C:C	A:A	S	T:T	Hobbit Sib:Hobbit Sib	C:C	C:C	C:C	3	A:A	C:C	wildtype:wildtype	G:G	C:C	C:C	G:G
SHANGHAI	T:T	G:G	D	A:A	T:T	NA	A:A	G:G	A:A	2*	G:G	G:G	C:C	A:A	C:C	G:G	H	T:T	Hobbit Sib:Hobbit Sib	C:C	G:G	G:G	2	A:A	C:C	wildtype:wildtype	A:A	T:T	C:C	G:G
Siete_Cerros	T:T	G:G	D	A:A	T:T	C:C	A:A	G:G	A:A	2*	C:C	G:G	C:C	A:A	C:C	G:G	H	T:T	Hobbit Sib:Hobbit Sib	T:T	C:C	G:G	1	A:A	C:C	wildtype:wildtype	G:G	C:C	C:C	G:G
SNOGG	C:C	G:G	T	A:A	T:T	C:C	G:G	G:G	A:A	2*	C:C	G:G	T:T	T:T	T:T	A:A	H	T:T	Hobbit Sib:Hobbit Sib	C:C	G:G	G:G	2	A:A	C:C	wildtype:wildtype	G:G	C:C	C:C	G:G
Sonora_64	C:C	T:T	D	A:A	T:T	C:C	A:A	G:G	A:A	2*	G:G	G:G	C:C	A:A	C:C	A:A	S	T:T	Hobbit Sib:Hobbit Sib	T:T	C:C	G:G	1	A:A	C:C	wildtype:wildtype	G:G	C:C	C:C	G:G
Sumai_3	C:C	G:G	T	T:T	C:C	G:G	G:G	G:G	G:G	null	C:C	G:G	T:T	A:A	C:C	A:A	S	C:C	Hobbit Sib:Hobbit Sib	T:T	C:C	G:G	1	A:A	C:C	wildtype:wildtype	A:A	C:C	C:C	G:G
Supera	T:T	G:G	D	A:A	T:T	C:C	A:A	G:G	A:A	2*	G:G	G:G	C:C	A:A	C:C	A:A	S	T:T	Hobbit Sib:Hobbit Sib	T:T	C:C	G:G	1	A:A	C:C	wildtype:wildtype	A:A	NA	NA	G:G
SYRIMEX	T:T	G:G	D	T:T	C:C	C:C	A:A	G:G	A:A	2*	C:C	G:G	C:C	A:A	C:C	A:A	S	C:C	Hobbit Sib:Hobbit Sib	T:T	C:C	G:G	1	A:A	C:C	wildtype:wildtype	A:A	C:C	C:C	C:C
T_50130	T:T	G:G	D	T:T	C:C	NA	A:A	A:A	A:A	1	C:C	T:T	C:C	A:A	T:T	A:A	H	C:C	Hobbit Sib:Hobbit Sib	T:T	C:C	G:G	1	A:A	C:C	wildtype:wildtype	G:G	C:C	C:C	G:G
TBIO_Abalone	T:T	G:G	D	A:A	T:T	C:C	A:A	G:G	A:A	2*	G:G	G:G	C:C	A:A	C:C	G:G	H	T:T	Hobbit Sib:Hobbit Sib	C:C	C:C	C:C	3	A:A	C:C	wildtype:wildtype	A:A	T:T	C:C	G:G
TBIO_Alvorada	T:T	G:G	D	A:A	T:T	C:C	A:A	G:G	A:A	2*	G:G	G:G	C:C	A:A	C:C	G:G	H	T:T	Hobbit Sib:Hobbit Sib	C:C	C:C	C:C	3	A:A	C:C	wildtype:wildtype	A:A	T:T	C:C	G:G
TBIO_Bandeirante	T:T	G:G	D	A:A	T:T	NA	A:A	G:G	A:A	2*	G:G	G:G	C:C	A:A	C:C	G:G	H	T:T	Hobbit Sib:Hobbit Sib	T:T	C:C	G:G	1	A:A	C:C	wildtype:wildtype	A:A	C:C	C:C	G:G
TBIO_Itaipu	T:T	G:G	D	A:A	T:T	NA	A:A	G:G	A:A	2*	G:G	G:G	C:C	A:A	C:C	G:G	H	T:T	Hobbit Sib:Hobbit Sib	C:C	C:C	C:C	3	A:A	C:C	wildtype:wildtype	A:A	T:T	C:C	G:G
TBIO_Mestre	T:T	G:G	D	A:A	T:T	NA	A:A	G:G	A:A	2*	G:G	G:G	T:T	A:A	C:C	G:G	H	T:T	Hobbit Sib:Hobbit Sib	C:C	C:C	C:C	3	A:A	C:C	wildtype:wildtype	A:A	T:T	C:C	G:G
TBIO_Seleto	T:T	G:G	D	T:T	C:C	C:C	A:A	A:A	A:A	1	G:G	G:G	C:C	A:A	C:C	G:G	H	T:T	Hobbit Sib:Hobbit Sib	T:T	C:C	G:G	1	A:A	C:C	wildtype:wildtype	A:A	T:T	C:C	G:G
TBIO_Sinuelo	T:T	G:G	D	A:A	T:T	C:C	A:A	A:A	A:A	1	G:G	G:G	C:C	A:A	C:C	G:G	H	T:T	Hobbit Sib:Hobbit Sib	C:C	C:C	C:C	3	A:A	C:C	wildtype:wildtype	A:A	C:C	C:C	G:G
TBIO_TIBAGI	T:T	G:G	D	A:A	T:T	C:C	A:A	G:G	A:A	2*	G:G	G:G	C:C	A:A	C:C	NA	S	T:T	Hobbit Sib:Hobbit Sib	T:T	C:C	G:G	1	A:A	C:C	wildtype:wildtype	A:A	T:T	C:C	G:G
TEC_Triunfo	C:C	T:T	D	A:A	T:T	C:C	A:A	G:G	A:A	2*	NA	G:G	C:C	A:A	C:C	G:G	H	T:T	Hobbit Sib:Hobbit Sib	T:T	C:C	G:G	1	A:A	C:C	wildtype:wildtype	A:A	T:T	C:C	G:G
TEC_Veloce	T:T	G:G	D	A:A	T:T	NA	A:A	G:G	A:A	2*	G:G	G:G	C:C	A:A	C:C	G:G	H	T:T	Hobbit Sib:Hobbit Sib	C:C	C:C	C:C	3	A:A	C:C	wildtype:wildtype	A:A	C:C	A:A	G:G
TEC_Vigore	T:T	G:G	D	A:A	T:T	C:C	A:A	G:G	A:A	2*	G:G	G:G	C:C	A:A	C:C	G:G	H	T:T	Hobbit Sib:Hobbit Sib	T:T	C:C	G:G	1	A:A	C:C	wildtype:wildtype	A:A	C:C	A:A	G:G
THATCHER_10	C:C	G:G	T	A:A	T:T	C:C	NA	A:A	A:A	1	G:G	G:G	C:C	A:A	C:C	A:A	S	T:T	Hobbit Sib:Hobbit Sib	C:C	C:C	C:C	3	A:A	C:C	wildtype:wildtype	G:G	C:C	C:C	G:G
TIACENA_1	C:C	T:T	D	A:A	T:T	NA	A:A	A:A	A:A	1	G:G	G:G	T:T	A:A	C:C	G:G	H	T:T	Hobbit Sib:Hobbit Sib	C:C	C:C	C:C	3	A:A	C:C	wildtype:wildtype	G:G	C:C	C:C	G:G
Topazio	T:T	G:G	D	A:A	T:T	C:C	A:A	G:G	A:A	2*	G:G	G:G	C:C	A:A	C:C	G:G	H	T:T	Hobbit Sib:Hobbit Sib	C:C	C:C	C:C	3	A:A	C:C	wildtype:wildtype	A:A	T:T	C:C	G:G
Toropi	C:C	G:G	T	A:A	T:T	C:C	A:A	G:G	A:A	2*	C:C	G:G	C:C	A:A	C:C	A:A	S	T:T	Hobbit Sib:Hobbit Sib	C:C	C:C	C:C	3	A:A	C:C	wildtype:wildtype	A:A	C:C	A:A	G:G
TOTA_63	C:C	G:G	T	A:A	T:T	C:C	NA	G:G	A:A	2*	C:C	G:G	C:C	A:A	C:C	A:A	S	T:T	Hobbit Sib:Hobbit Sib	T:T	C:C	G:G	1	A:A	C:C	wildtype:wildtype	A:A	C:C	C:C	C:C
Transfer	C:C	G:G	T	T:T	C:C	C:C	NA	G:G	G:G	null	C:C	G:G	C:C	A:A	C:C	A:A	S	T:T	Hobbit Sib:Hobbit Sib	C:C	C:C	G:G	0	A:A	C:C	wildtype:wildtype	A:A	C:C	C:C	G:G
Trigo_BR_1	C:C	G:G	T	A:A	T:T	C:C	A:A	G:G	A:A	2*	C:C	G:G	C:C	A:A	C:C	A:A	S	T:T	Hobbit Sib:Hobbit Sib	C:C	C:C	C:C	3	A:A	C:C	wildtype:wildtype	A:A	C:C	C:C	G:G
Trigo_BR_10_Formosa	C:C	T:T	D	A:A	T:T	NA	A:A	G:G	G:G	null	G:G	G:G	C:C	A:A	C:C	G:G	H	T:T	Hobbit Sib:Hobbit Sib	T:T	C:C	G:G	1	C:C	C:C	wildtype:wildtype	A:A	C:C	C:C	G:G
Trigo_BR_11_Guarani	T:T	G:G	D	T:T	C:C	C:C	A:A	A:A	A:A	1	G:G	G:G	T:T	A:A	C:C	G:G	H	T:T	Hobbit Sib:Hobbit Sib	T:T	C:C	G:G	1	A:A	C:C	wildtype:wildtype	A:A	C:C	C:C	C:C
Trigo_BR_12_Aruana	C:C	T:T	D	A:A	T:T	C:C	A:A	G:G	A:A	2*	C:C	G:G	T:T	A:A	C:C	G:G	H	T:T	Hobbit Sib:Hobbit Sib	T:T	C:C	G:G	1	A:A	C:C	wildtype:wildtype	G:G	C:C	C:C	G:G
TRIGO_BR_14	C:C	G:G	T	A:A	T:T	C:C	A:A	G:G	A:A	2*	C:C	G:G	C:C	A:A	C:C	A:A	S	T:T	Hobbit Sib:Hobbit Sib	T:T	C:C	G:G	1	A:A	C:C	wildtype:wildtype	A:A	C:C	C:C	G:G
Trigo_BR_15	T:T	G:G	D	A:A	T:T	C:C	A:A	G:G	A:A	2*	C:C	G:G	C:C	A:A	C:C	A:A	S	T:T	Hobbit Sib:Hobbit Sib	C:C	C:C	C:C	3	A:A	C:C	wildtype:wildtype	A:A	C:C	A:A	G:G
Trigo_BR_17_Caiua	C:C	T:T	D	T:T	C:C	NA	A:A	G:G	G:G	null	G:G	G:G	C:C	A:A	T:T	A:A	H	T:T	Hobbit Sib:Hobbit Sib	T:T	C:C	G:G	1	A:A	C:C	wildtype:wildtype	G:G	C:C	C:C	G:G
Trigo_BR_19	C:C	G:G	T	A:A	T:T	C:C	A:A	G:G	A:A	2*	C:C	G:G	C:C	A:A	C:C	A:A	S	T:T	Hobbit Sib:Hobbit Sib	C:C	C:C	C:C	3	A:A	C:C	wildtype:wildtype	A:A	C:C	C:C	G:G
Trigo_BR_2	C:C	G:G	T	A:A	T:T	C:C	A:A	G:G	A:A	2*	G:G	G:G	C:C	A:A	T:T	A:A	H	T:T	Hobbit Sib:Hobbit Sib	C:C	C:C	C:C	3	A:A	C:C	wildtype:wildtype	A:A	C:C	A:A	G:G
Trigo_BR_20_Guato	C:C	G:G	T	A:A	T:T	C:C	A:A	G:G	A:A	2*	C:C	G:G	C:C	A:A	C:C	A:A	S	T:T	Hobbit Sib:Hobbit Sib	T:T	C:C	G:G	1	A:A	C:C	wildtype:wildtype	A:A	C:C	C:C	G:G
Trigo_BR_21_Nhandeva	C:C	T:G	T	A:A	T:T	NA	A:A	A:A	A:A	1	G:G	G:G	T:T	A:A	C:C	A:A	S	T:T	Hobbit Sib:Hobbit Sib	T:T	C:C	G:G	1	A:A	C:C	wildtype:wildtype	A:A	C:C	C:C	G:G
Trigo_BR_23	C:C	T:T	D	T:T	C:C	NA	A:A	G:G	G:G	null	C:C	G:G	C:C	A:A	C:C	A:A	S	T:T	Hobbit Sib:Hobbit Sib	C:C	C:C	C:C	3	C:C	C:C	wildtype:wildtype	A:A	C:C	C:C	G:G
Trigo_BR_24	C:C	G:G	T	A:A	T:T	NA	A:A	G:G	A:A	2*	G:G	G:G	C:C	A:A	C:C	A:A	S	T:T	Hobbit Sib:Hobbit Sib	T:T	C:C	G:G	1	A:A	NA	NA	A:A	C:C	A:A	G:G
TRIGO_BR_26-SAO_GOTARDO	T:T	G:G	D	A:A	T:T	NA	A:A	A:A	A:A	1	G:G	G:G	C:C	A:A	C:C	G:G	H	T:T	Hobbit Sib:Hobbit Sib	T:T	C:C	G:G	1	C:C	C:C	wildtype:wildtype	A:A	T:T	C:C	G:G
Trigo_BR_27	C:C	T:T	D	A:A	T:T	C:C	NA	G:G	A:A	2*	C:C	G:G	C:C	A:A	C:C	A:A	S	T:T	Hobbit Sib:Hobbit Sib	C:C	C:C	C:C	3	A:A	C:C	wildtype:wildtype	A:A	C:C	A:A	G:G
Trigo_BR_28	C:C	G:G	T	A:A	T:T	NA	A:A	G:G	A:A	2*	C:C	G:G	C:C	A:A	C:C	A:A	S	T:T	Hobbit Sib:Hobbit Sib	C:C	C:C	C:C	3	A:A	C:C	wildtype:wildtype	A:A	C:C	C:C	NA
Trigo_BR_29_Javae	C:C	T:T	D	T:T	C:C	NA	A:A	G:G	A:A	2*	G:G	G:G	C:C	A:A	C:C	G:G	H	T:T	Hobbit Sib:Hobbit Sib	T:T	C:C	G:G	1	A:A	C:C	wildtype:wildtype	A:A	C:C	C:C	G:G
Trigo_BR_3	C:C	G:G	T	A:A	T:T	C:C	A:A	G:G	A:A	2*	G:G	G:G	C:C	A:A	T:T	A:A	H	T:T	Hobbit Sib:Hobbit Sib	C:C	C:C	C:C	3	A:A	C:C	wildtype:wildtype	A:A	C:C	A:A	G:G
Trigo_BR_32	C:C	G:G	T	A:A	T:T	NA	A:A	G:G	G:G	null	G:G	G:G	C:C	A:A	C:C	G:G	H	T:T	Hobbit Sib:Hobbit Sib	C:C	C:C	C:C	3	C:C	C:C	wildtype:wildtype	A:A	T:T	C:C	G:G
Trigo_BR_32	C:C	G:G	T	A:A	T:T	NA	A:A	G:G	G:G	null	G:G	G:G	C:C	A:A	C:C	G:G	H	T:T	Hobbit Sib:Hobbit Sib	C:C	C:C	C:C	3	C:C	C:C	wildtype:wildtype	A:A	T:T	C:C	G:G
Trigo_BR_33_Guara	C:C	T:T	D	T:T	C:C	C:C	A:A	G:G	A:A	2*	C:C	G:G	T:T	A:A	C:C	G:G	H	T:T	Hobbit Sib:Hobbit Sib	T:T	C:C	G:G	1	A:A	C:C	wildtype:wildtype	G:G	C:C	C:C	G:G
Trigo_BR_34	C:C	G:G	T	A:A	T:T	C:C	A:A	G:G	A:A	2*	C:C	G:G	C:C	A:A	C:C	A:A	S	T:T	Hobbit Sib:Hobbit Sib	C:C	C:C	C:C	3	A:A	NA	NA	A:A	C:C	A:A	C:C
Trigo_BR_39_Parauna	C:C	T:T	D	T:T	C:C	C:C	NA	G:G	A:A	2*	C:C	G:G	C:C	A:A	T:T	A:A	H	T:T	Hobbit Sib:Hobbit Sib	T:T	C:C	G:G	1	A:A	C:C	wildtype:wildtype	G:G	C:C	C:C	C:C
Trigo_BR_4	C:C	G:G	T	A:A	T:T	C:C	A:A	G:G	A:A	2*	C:C	G:G	C:C	A:A	C:C	A:A	S	T:T	Hobbit Sib:Hobbit Sib	C:C	C:C	C:C	3	A:A	C:C	wildtype:wildtype	A:A	C:C	C:C	G:G
Trigo_BR_40	T:T	G:G	D	A:A	T:T	C:C	A:A	G:G	A:A	2*	G:G	G:G	T:T	A:A	C:C	G:G	H	T:T	Hobbit Sib:Hobbit Sib	T:T	C:C	G:G	1	A:A	C:C	wildtype:wildtype	A:A	C:C	A:A	G:G
Trigo_BR_43	C:C	G:G	T	A:A	T:T	C:C	G:G	G:G	A:A	2*	C:C	G:G	C:C	A:A	C:C	A:A	S	T:T	Hobbit Sib:Hobbit Sib	C:C	C:C	C:C	3	A:A	NA	NA	A:A	C:C	C:C	C:C
Trigo_BR_8	C:C	G:G	T	A:A	T:T	C:C	A:A	G:G	A:A	2*	G:G	G:G	T:T	A:A	C:C	A:A	S	T:T	Hobbit Sib:Hobbit Sib	C:C	C:C	C:C	3	A:A	C:C	wildtype:wildtype	A:A	C:C	A:A	G:G
Trigo_Chapeu	C:C	G:G	T	A:A	T:T	NA	A:A	A:A	A:A	1	C:C	G:G	T:T	T:T	C:C	A:A	S	T:T	Hobbit Sib:Hobbit Sib	C:C	C:C	G:G	0	A:A	C:C	wildtype:wildtype	G:G	C:C	C:C	G:G
Trintecinco	C:C	G:G	T	A:A	T:T	C:C	A:A	G:G	A:A	2*	C:C	G:G	C:C	A:A	C:C	A:A	S	T:T	Hobbit Sib:Hobbit Sib	C:C	C:C	C:C	3	C:C	C:C	wildtype:wildtype	A:A	C:C	A:A	G:G
Turquesa	T:T	G:G	D	A:A	T:T	NA	A:A	G:G	A:A	2*	G:G	G:G	C:C	A:A	C:C	G:G	H	T:T	Hobbit Sib:Hobbit Sib	C:C	C:C	C:C	3	C:C	C:C	wildtype:wildtype	A:A	T:T	C:C	G:G
Vaqueano	T:T	G:G	D	A:A	T:T	C:C	A:A	G:G	A:A	2*	G:G	G:G	C:C	A:A	C:C	G:G	H	T:T	Hobbit Sib:Hobbit Sib	C:C	C:C	C:C	3	A:A	C:C	wildtype:wildtype	A:A	T:T	C:C	G:G
Veadeiros	C:C	G:G	T	T:T	C:C	NA	A:A	G:G	A:A	2*	C:C	G:G	C:C	A:A	C:C	A:A	S	T:T	Hobbit Sib:Hobbit Sib	C:C	G:G	G:G	2	A:A	C:C	wildtype:wildtype	A:A	C:C	A:A	G:G
VEERY	T:T	G:G	D	A:A	T:T	C:C	A:A	A:A	A:A	1	G:G	G:G	C:C	A:A	C:C	G:G	H	T:T	Hobbit Sib:Hobbit Sib	T:T	C:C	G:G	1	A:A	C:C	wildtype:wildtype	A:A	T:T	C:C	G:G
VEERY_2	T:T	G:G	D	A:A	T:T	NA	A:A	A:A	A:A	1	G:G	G:G	C:C	A:A	C:C	G:G	H	T:T	Hobbit Sib:Hobbit Sib	T:T	C:C	G:G	1	A:A	C:C	wildtype:wildtype	A:A	T:T	C:C	G:G
VEERY_SIB	C:C	G:G	T	T:T	C:C	NA	A:A	G:G	A:A	2*	C:C	G:G	C:C	A:A	C:C	A:A	S	T:T	Hobbit Sib:Hobbit Sib	C:C	C:C	C:C	3	A:A	C:C	wildtype:wildtype	A:A	C:C	C:C	G:G
VULTURE_SIB	T:T	T:T	D	T:T	C:C	C:C	A:A	A:A	A:A	1	C:C	G:G	T:T	A:A	C:C	A:A	S	T:T	Hobbit Sib:Hobbit Sib	T:T	C:C	G:G	1	C:C	C:C	wildtype:wildtype	G:G	C:C	C:C	G:G
W_185	C:C	T:T	D	A:A	T:T	NA	A:A	G:G	G:G	null	G:G	G:G	T:T	A:A	C:C	G:G	H	T:T	Hobbit Sib:Hobbit Sib	T:T	C:C	G:G	1	A:A	C:C	wildtype:wildtype	G:G	C:C	C:C	G:G
WEEBILL_1	T:T	G:G	D	A:A	T:T	C:C	A:A	A:A	A:A	1	G:G	G:G	C:C	A:A	C:C	G:G	H	T:T	Hobbit Sib:Hobbit Sib	T:T	C:C	G:G	1	C:C	C:C	wildtype:wildtype	A:A	T:T	C:C	G:G
WRT_238_5	C:C	G:G	T	T:T	C:C	C:C	NA	G:G	G:G	null	C:C	G:G	C:C	A:A	C:C	A:A	S	T:T	Hobbit Sib:Hobbit Sib	C:C	C:C	G:G	0	A:A	C:C	wildtype:wildtype	A:A	C:C	C:C	G:G
YAQU_ 54	C:C	G:G	T	A:A	T:T	NA	A:A	G:G	A:A	2*	C:C	G:G	C:C	A:A	C:C	G:G	H	T:T	Hobbit Sib:Hobbit Sib	C:C	C:C	C:C	3	A:A	C:C	wildtype:wildtype	G:G	C:C	C:C	G:G
ZAMBEZI	T:T	G:G	D	A:A	T:T	NA	A:A	G:G	A:A	2*	C:C	G:G	T:T	A:A	C:C	G:G	H	T:T	Hobbit Sib:Hobbit Sib	T:T	C:C	G:G	1	A:A	C:C	wildtype:wildtype	G:G	C:C	C:C	G:G
	154	294	139	262	262	198	316	86	56	85	168	337	294	343	302	199	158	318	343	169	334	201	320	304	325	318	288	65	265	314
	191	53	206	85	86	2	11	263	291	207	177	9	54	2	37	135	172	29	4	178	10	141	24	42	4	7	61	282	81	28
	0	1	0	1	0	0	0	0	1	56	0	0	1	1	0	0	0	1	0	0	0	3	0	0	0	0	0	0	1	0
	4	1	4	1	1	149	22	0	1	1	4	3	0	3	10	15	19	1	2	2	5	4	5	3	20	24	0	2	2	7
	349	349	349	349	349	349	349	349	349	349	349	349	349	349	349	349	349	349	349	349	349	349	349	349	349	349	349	349	349	349
																							11
																							140
																							500
																						0	169
																						1	11
																						2	140
																						3	24
																						het	0
																						na	5
